# Supplementary material for: Synthesis of P-stereogenic diarylphosphinic amides by directed lithiation: transformation into tertiary phosphine oxides via methanolysis, aryne chemistry and complexation behaviour toward zinc(ii)
Source: Royal Society of Chemistry journal article supplement (doi:10.1039/c5dt02860d), 2015-08-27
Supplement: c5dt02860d1.pdf [file c5dt02860d1.pdf]

## Supporting information

# Synthesis of P-stereogenic diarylphosphinic amides by directed lithiation: transformation into tertiary phosphine oxides via aryne chemistry and complexation behaviour toward zinc(II)

Miguel A. del Águila-Sánchez,<sup>a</sup> Yolanda Navarro,<sup>a</sup> Jesús García López,<sup>a</sup> Guilherme P. Guedes<sup>b</sup> and Fernando López Ortiz\*<sup>a</sup>

<sup>a</sup> Área de Química Orgánica, Universidad de Almería, Carretera de Sacramento s/n, 04120 Almería, Spain.

<sup>b</sup> Instituto de Ciências Exatas, Departamento de Química, Universidade Federal Rural do Rio de Janeiro, 23870-000 Seropédica, RJ, Brazil.

### Contents

|                                                                                                             |            |
|-------------------------------------------------------------------------------------------------------------|------------|
| <b>Figure S1.</b> (a) <sup>1</sup> H and (b) <sup>13</sup> C NMR spectra of compound <b>7c</b> .....        | <b>S3</b>  |
| <b>Figure S2.</b> (a) <sup>1</sup> H and (b) <sup>13</sup> C NMR spectra of compound <b>7d</b> .....        | <b>S4</b>  |
| <b>Figure S3.</b> (a) <sup>1</sup> H and (b) <sup>13</sup> C NMR spectra of compound <b>18 or 18'</b> ..... | <b>S5</b>  |
| <b>Figure S4.</b> (a) <sup>1</sup> H and (b) <sup>13</sup> C NMR spectra of compound <b>19</b> .....        | <b>S6</b>  |
| <b>Figure S5.</b> (a) <sup>1</sup> H and (b) <sup>13</sup> C NMR spectra of compound <b>19'</b> .....       | <b>S7</b>  |
| <b>Figure S6.</b> (a) <sup>1</sup> H and (b) <sup>13</sup> C NMR spectra of compound <b>20</b> .....        | <b>S8</b>  |
| <b>Figure S7.</b> (a) <sup>1</sup> H and (b) <sup>13</sup> C NMR spectra of compound <b>21</b> .....        | <b>S9</b>  |
| <b>Figure S8.</b> (a) <sup>1</sup> H and (b) <sup>13</sup> C NMR spectra of compound <b>22</b> .....        | <b>S10</b> |
| <b>Figure S9.</b> (a) <sup>1</sup> H and (b) <sup>13</sup> C NMR spectra of compound <b>23</b> .....        | <b>S11</b> |
| <b>Figure S10.</b> (a) <sup>1</sup> H and (b) <sup>13</sup> C NMR spectra of compound <b>24</b> .....       | <b>S12</b> |
| <b>Figure S11.</b> (a) <sup>1</sup> H and (b) <sup>13</sup> C NMR spectra of compound <b>25</b> .....       | <b>S13</b> |
| <b>Figure S12.</b> (a) <sup>1</sup> H and (b) <sup>13</sup> C NMR spectra of compound <b>26</b> .....       | <b>S14</b> |
| <b>Figure S13.</b> (a) <sup>1</sup> H and (b) <sup>13</sup> C NMR spectra of compound <b>27</b> .....       | <b>S15</b> |
| <b>Figure S14.</b> (a) <sup>1</sup> H and (b) <sup>13</sup> C NMR spectra of compound <b>28</b> .....       | <b>S16</b> |
| <b>Figure S15.</b> (a) <sup>1</sup> H and (b) <sup>13</sup> C NMR spectra of compound <b>29</b> .....       | <b>S17</b> |
| <b>Figure S16.</b> (a) <sup>1</sup> H and (b) <sup>13</sup> C NMR spectra of compound <b>32</b> .....       | <b>S18</b> |

|                                                                                                                                                                                                                                                                                                               |            |
|---------------------------------------------------------------------------------------------------------------------------------------------------------------------------------------------------------------------------------------------------------------------------------------------------------------|------------|
| <b>Figure S17.</b> (a) $^1\text{H}$ and (b) $^{13}\text{C}$ NMR spectra of compound <b>34</b> .....                                                                                                                                                                                                           | <b>S19</b> |
| <b>Figure S18.</b> Computed structures for the reaction between <b>A</b> and benzyne <b>II</b> .....                                                                                                                                                                                                          | <b>S20</b> |
| <b>Figure S19.</b> (a) Graph of relative energy $\Delta E$ and TP along the IRC for the transformation of <b>TS1</b> into intermediate <b>E</b> . (b) Key structures found along the IRC. (c) Computed structures of species <b>B</b> , <b>C</b> and <b>D</b> including selected geometrical parameters ..... | <b>S21</b> |
| <b>Table S1.</b> The Cartesian coordinates ( $\text{\AA}$ ), SCF energies, enthalpies at 333 K, and Gibbs free energies at 333 K for the optimized structures. ....                                                                                                                                           | <b>S22</b> |
| <b>Figure S20.</b> X-ray crystal structure of <b>19</b> .....                                                                                                                                                                                                                                                 | <b>S28</b> |
| <b>Figure S21.</b> X-ray crystal structure of <b>19'</b> .....                                                                                                                                                                                                                                                | <b>S28</b> |
| <b>Figure S22.</b> X-ray crystal structure of <b>20</b> .....                                                                                                                                                                                                                                                 | <b>S29</b> |
| <b>Figure S23.</b> X-ray crystal structure of <b>34</b> .....                                                                                                                                                                                                                                                 | <b>S29</b> |
| <b>Table S2.</b> Selected crystal data for ligands ligands <b>19</b> , <b>19'</b> , <b>20</b> and complex <b>34</b> .....                                                                                                                                                                                     | <b>S30</b> |
| <b>Table S3.</b> Selected bond lengths ( $\text{\AA}$ ) and angles ( $^\circ$ ) for ligands <b>19</b> , <b>19'</b> , <b>20</b> and complex <b>34</b> .....                                                                                                                                                    | <b>S31</b> |

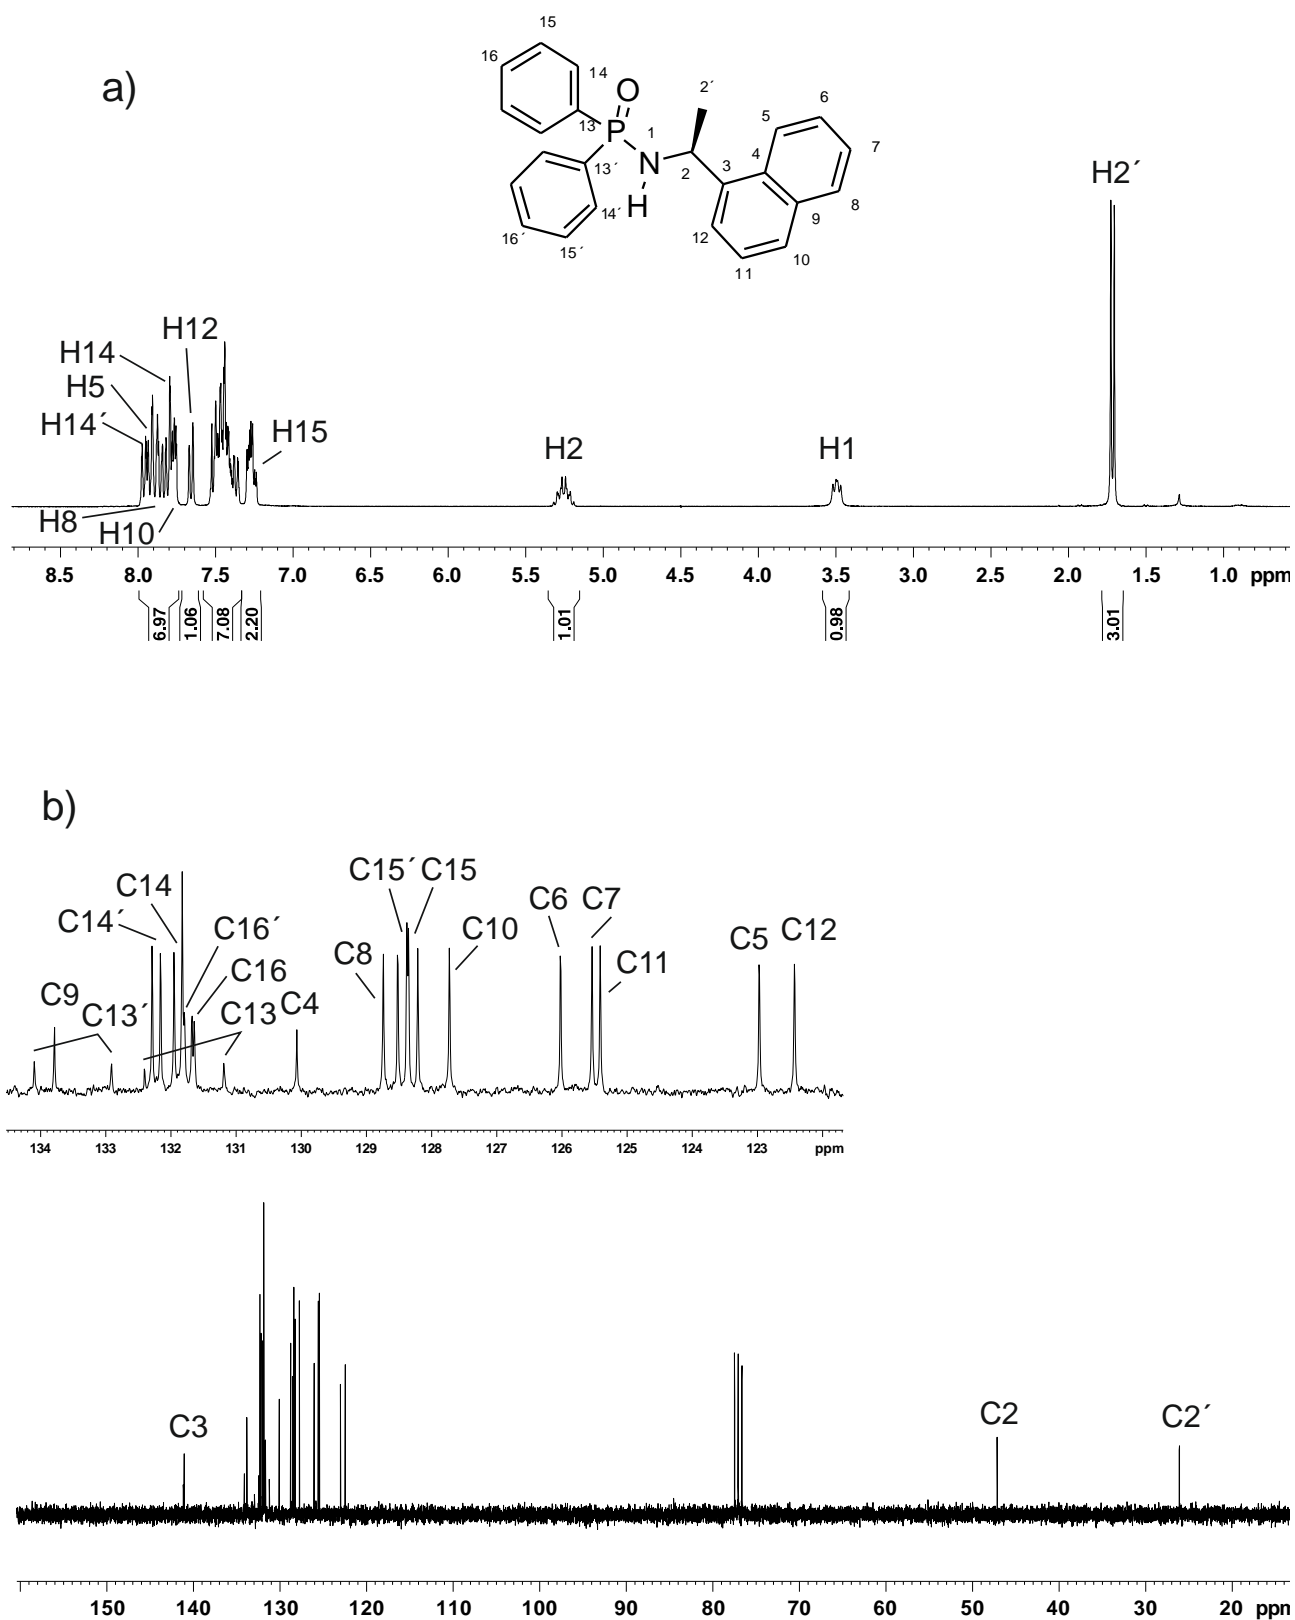

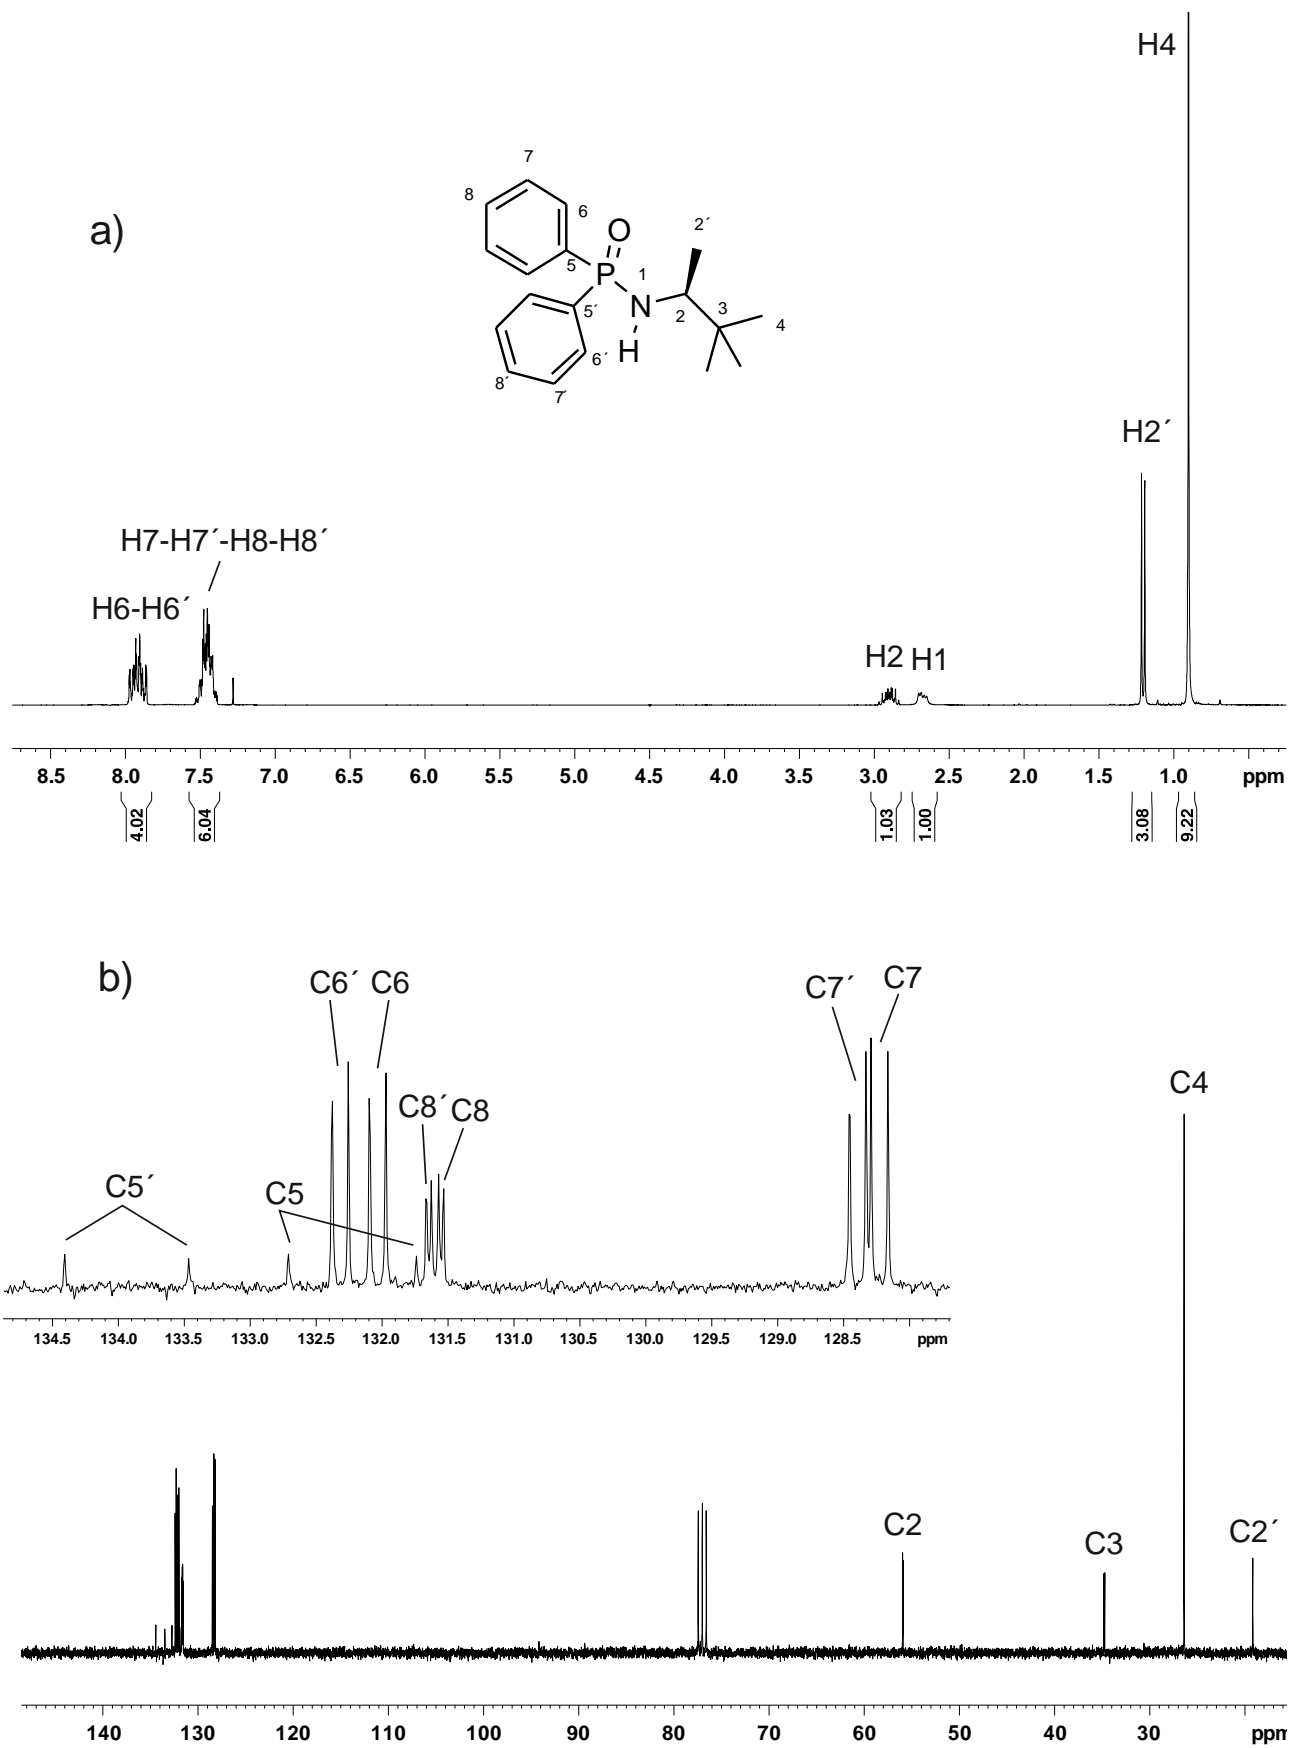

Figure S2. (a)  $^1\text{H}$  (300.13 MHz) and (b)  $^{13}\text{C}$  (75.47 MHz) NMR spectra of compound **7d**

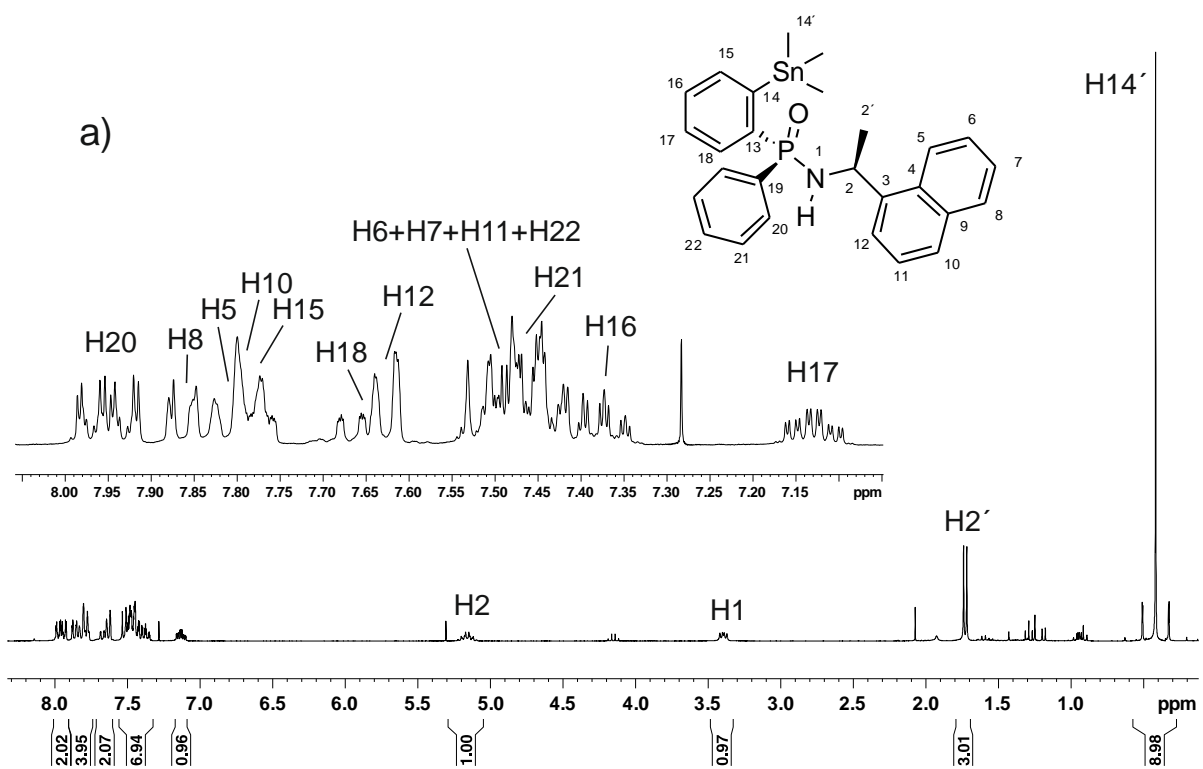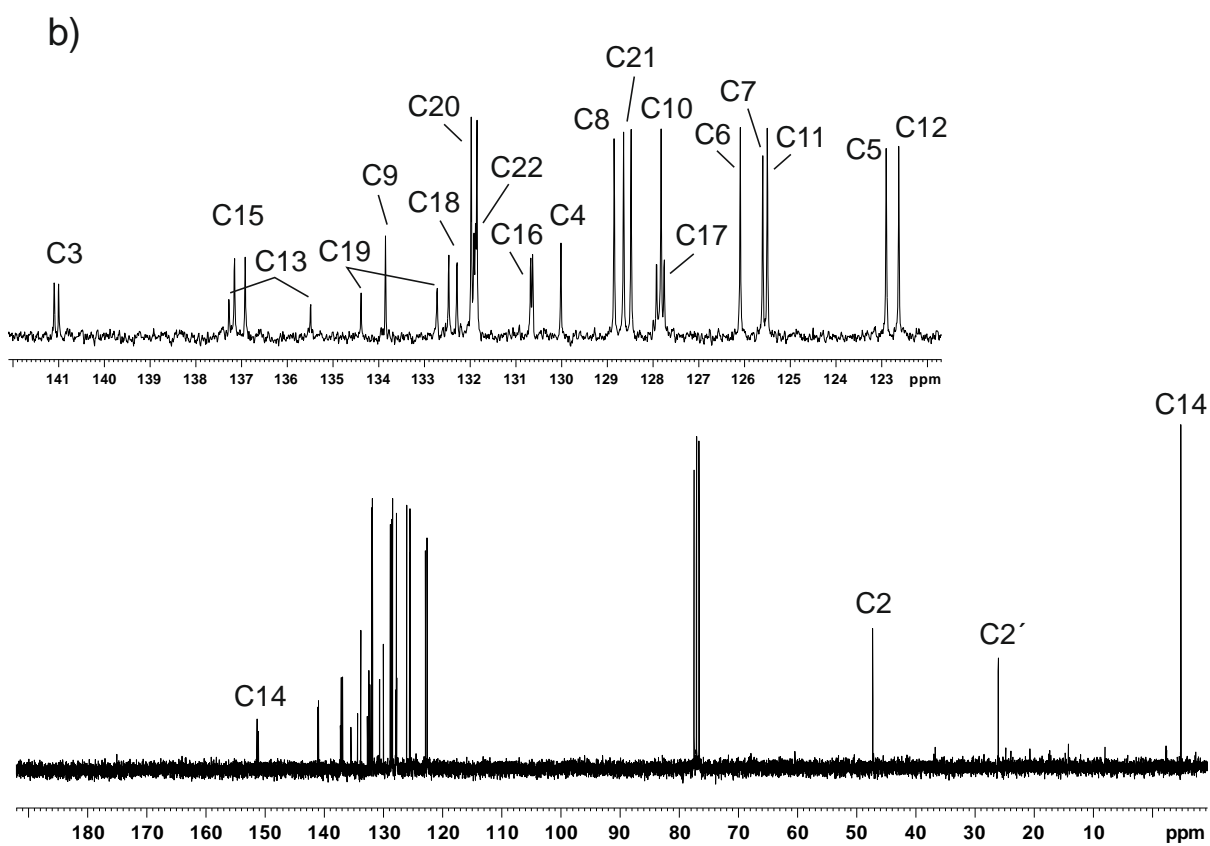

Figure S3. (a) <sup>1</sup>H (300.13 MHz) and (b) <sup>13</sup>C (75.47 MHz) NMR spectra of compound **18** or **18'**

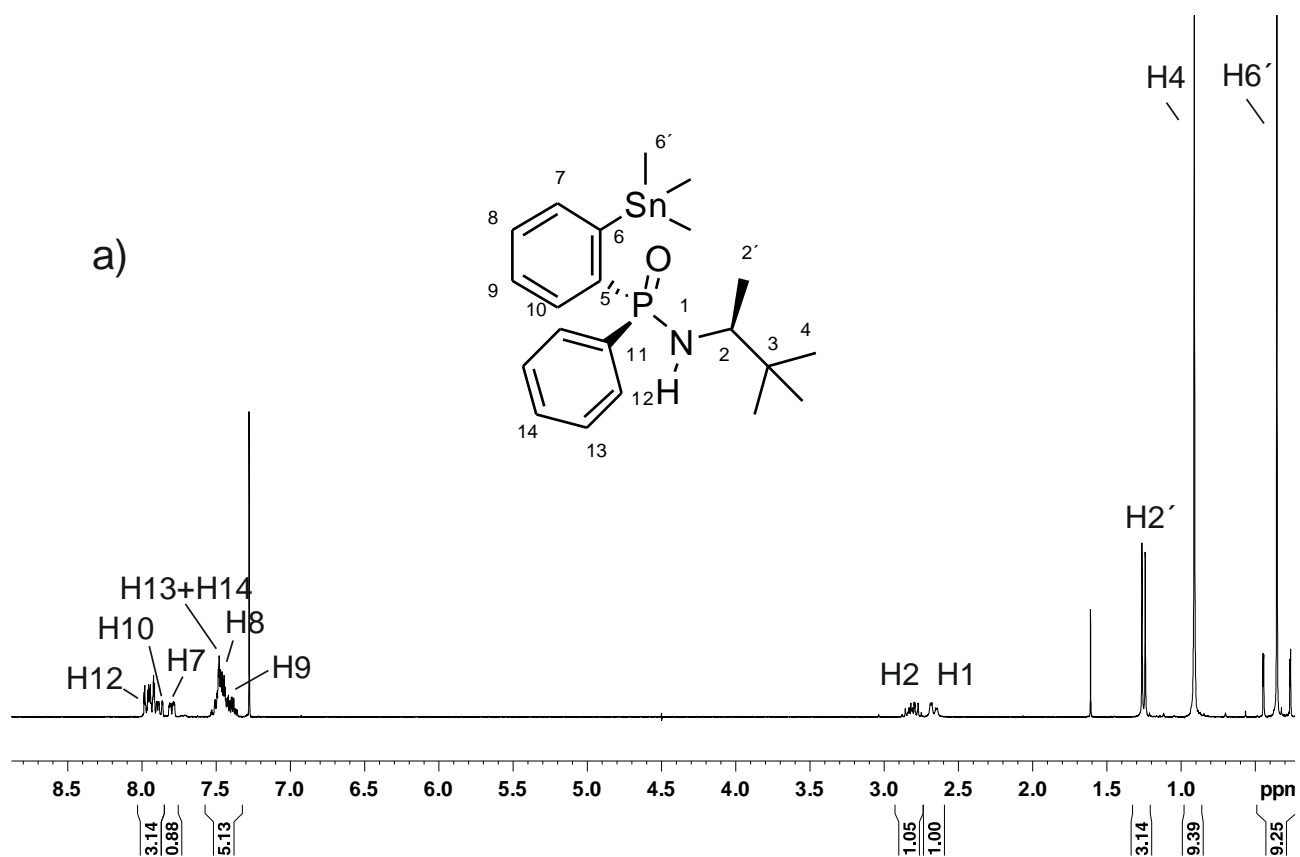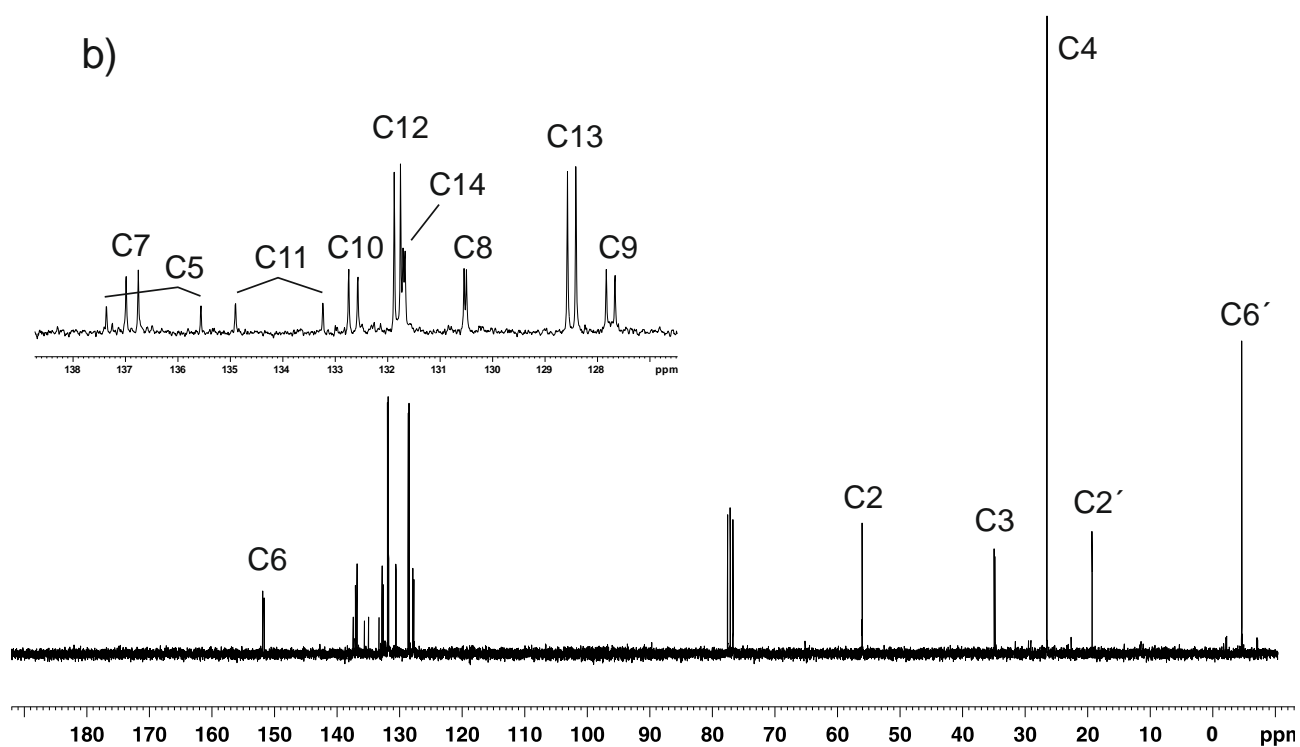

Figure S4. (a)  $^1\text{H}$  (300.13 MHz) and (b)  $^{13}\text{C}$  (75.47 MHz) NMR spectra of compound  $(S_p, S_c)$ -19

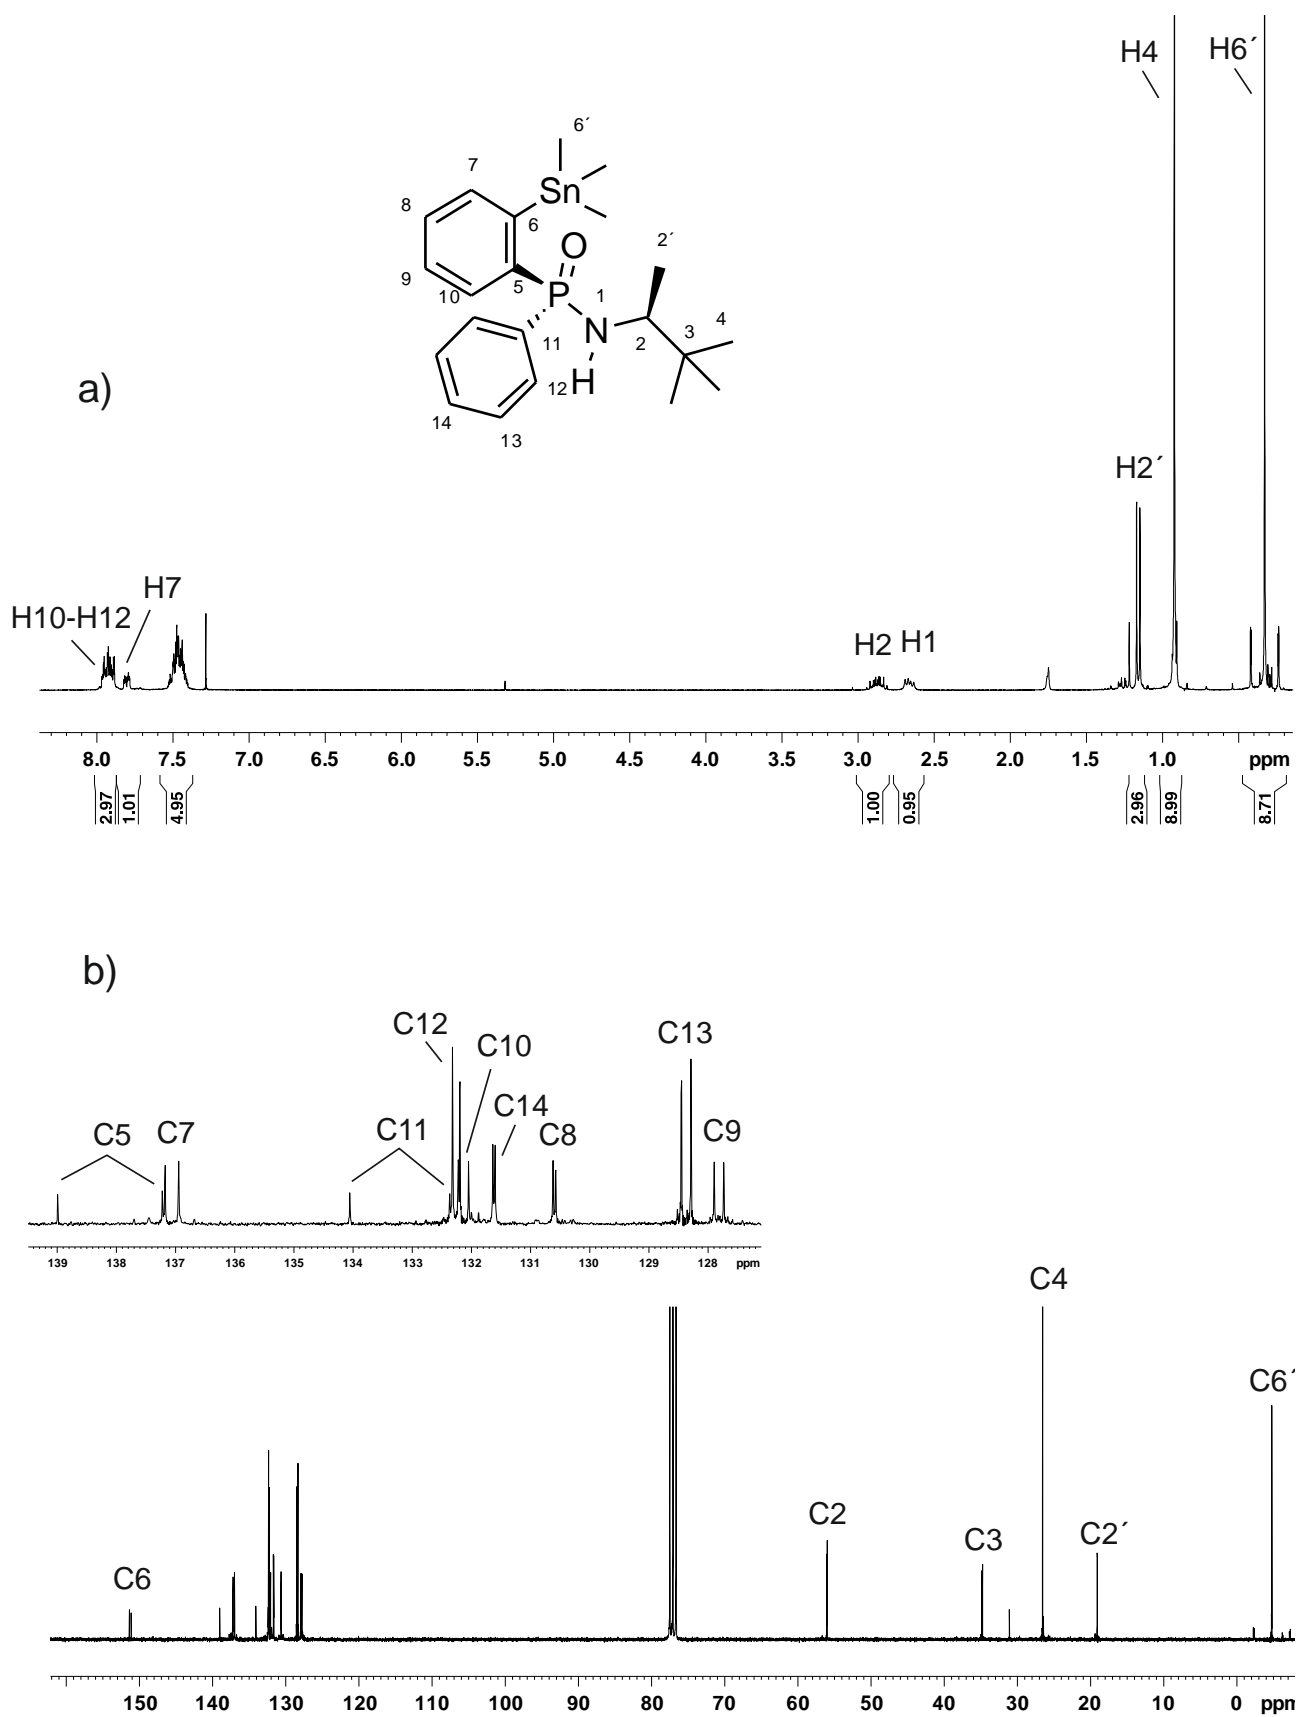

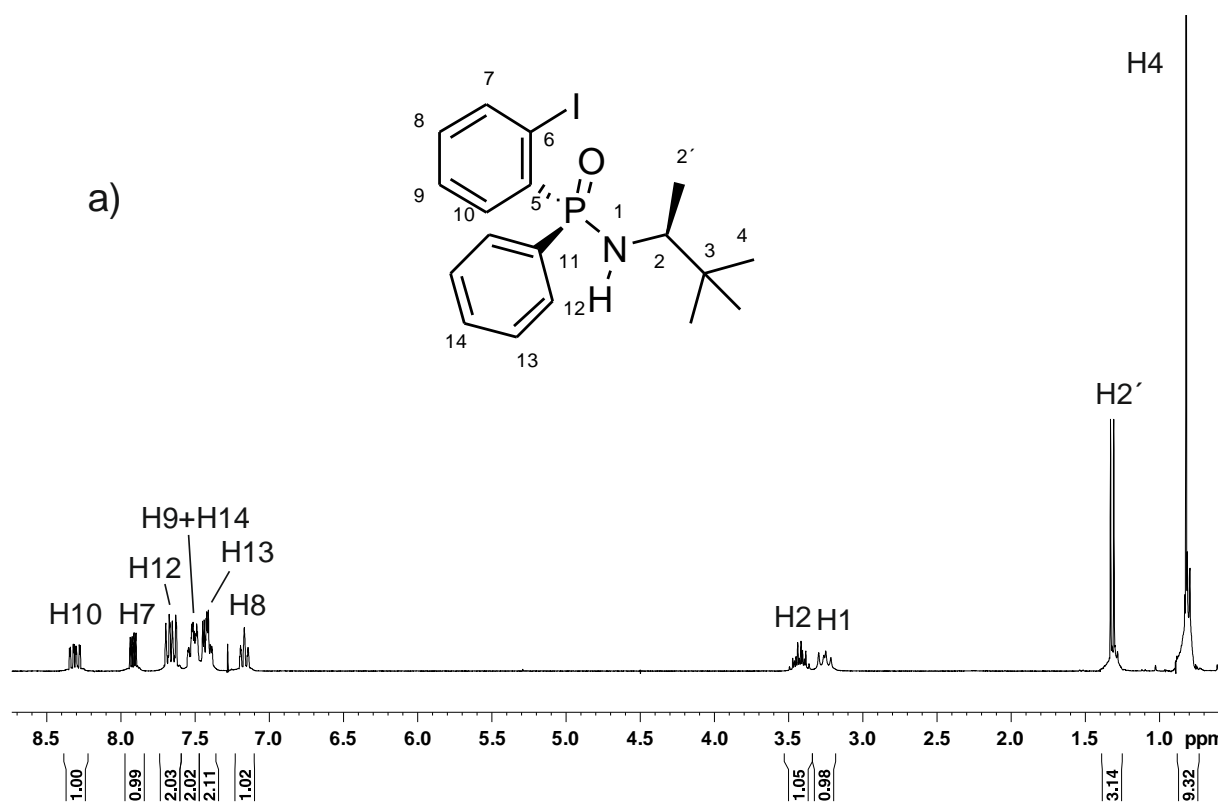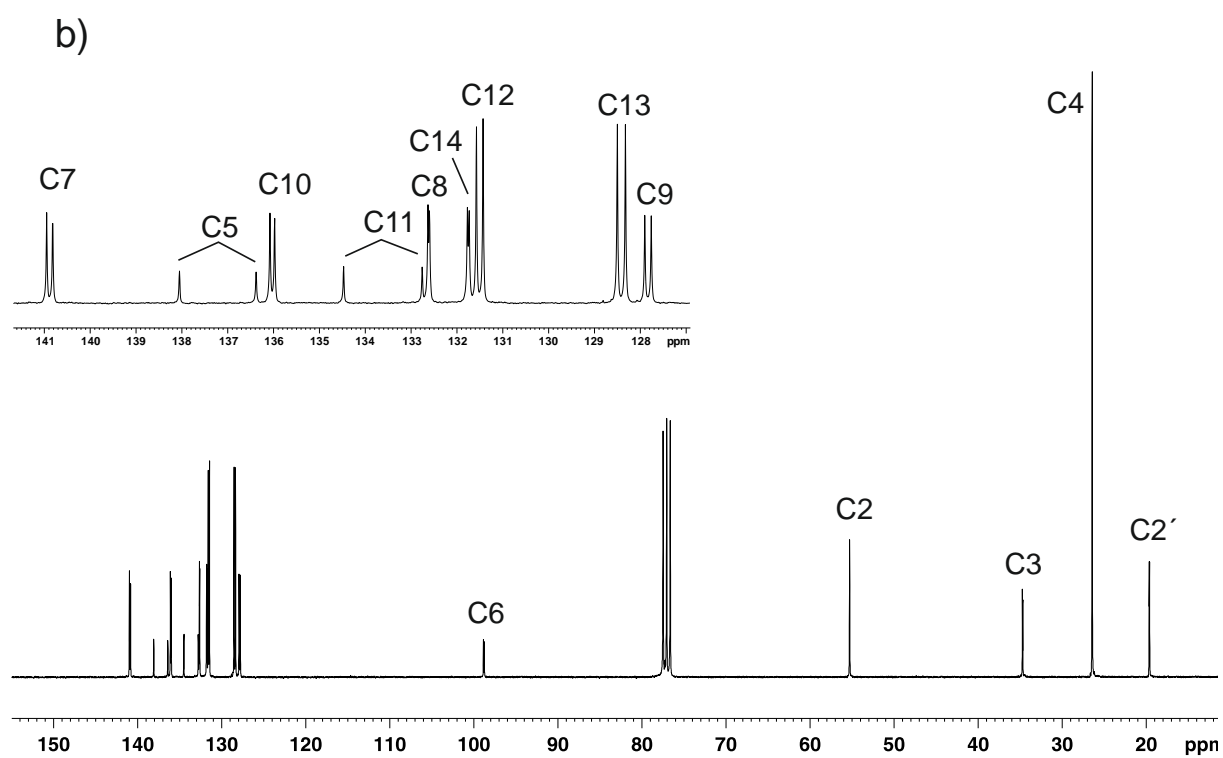

Figure S6. (a)  $^1\text{H}$  (300.13 MHz) and (b)  $^{13}\text{C}$  (75.47 MHz) NMR spectra of compound 20



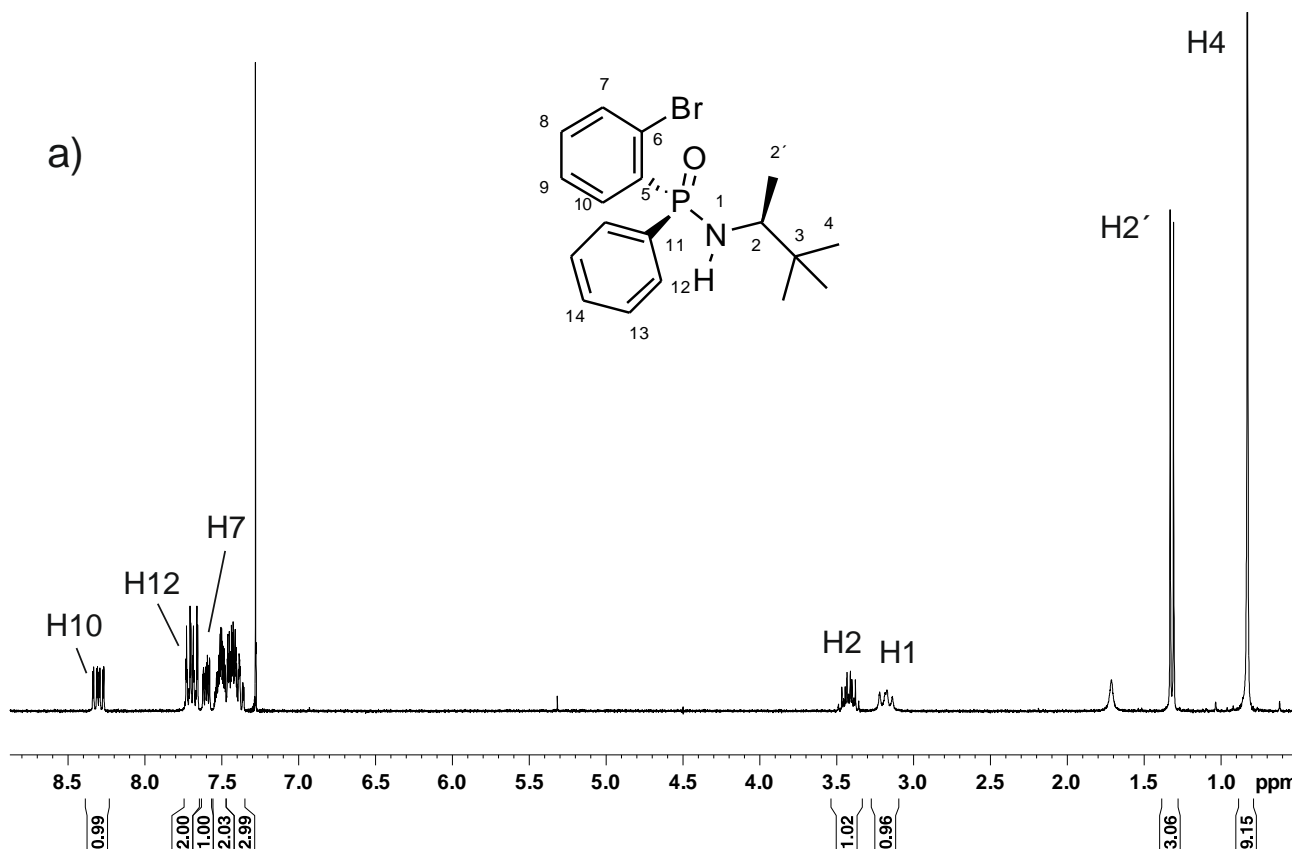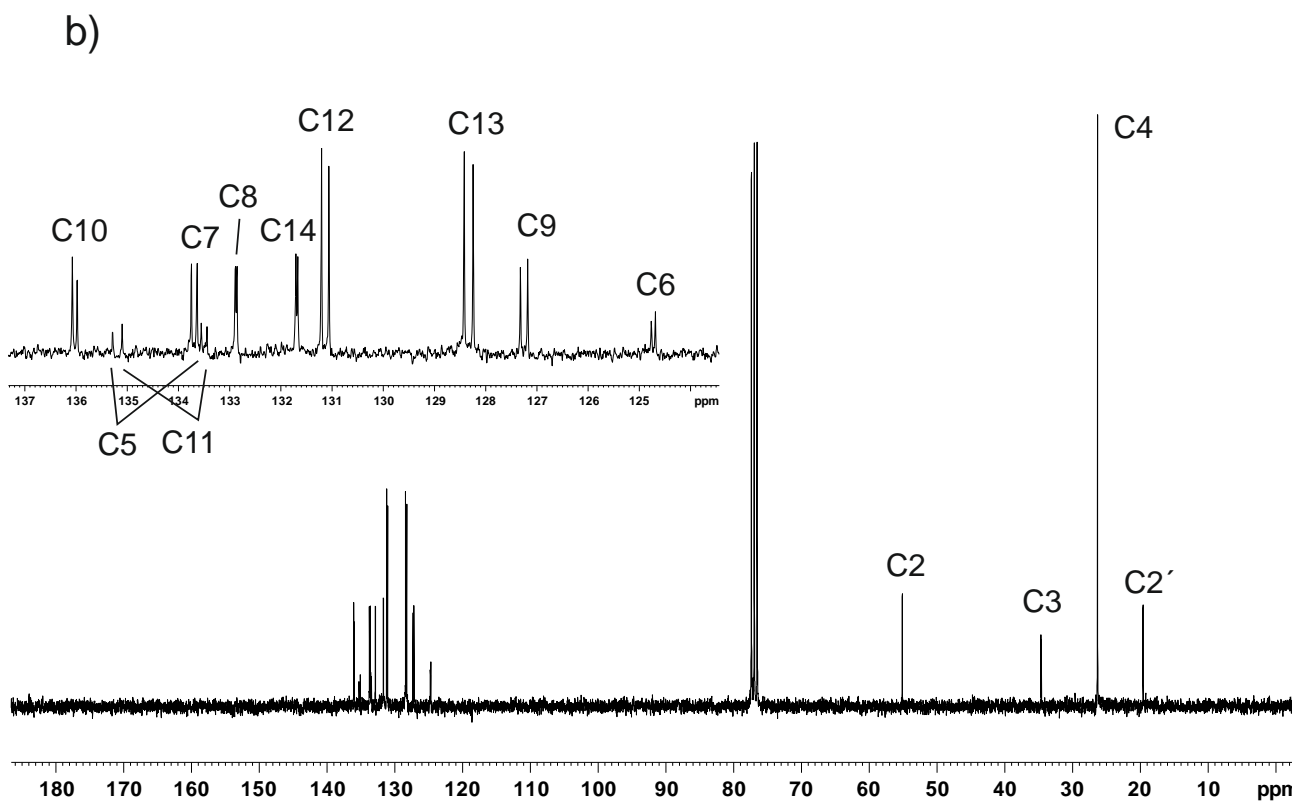

Figure S7. (a)  $^1\text{H}$  (300.13 MHz) and (b)  $^{13}\text{C}$  (75.47 MHz) NMR spectra of compound **21**

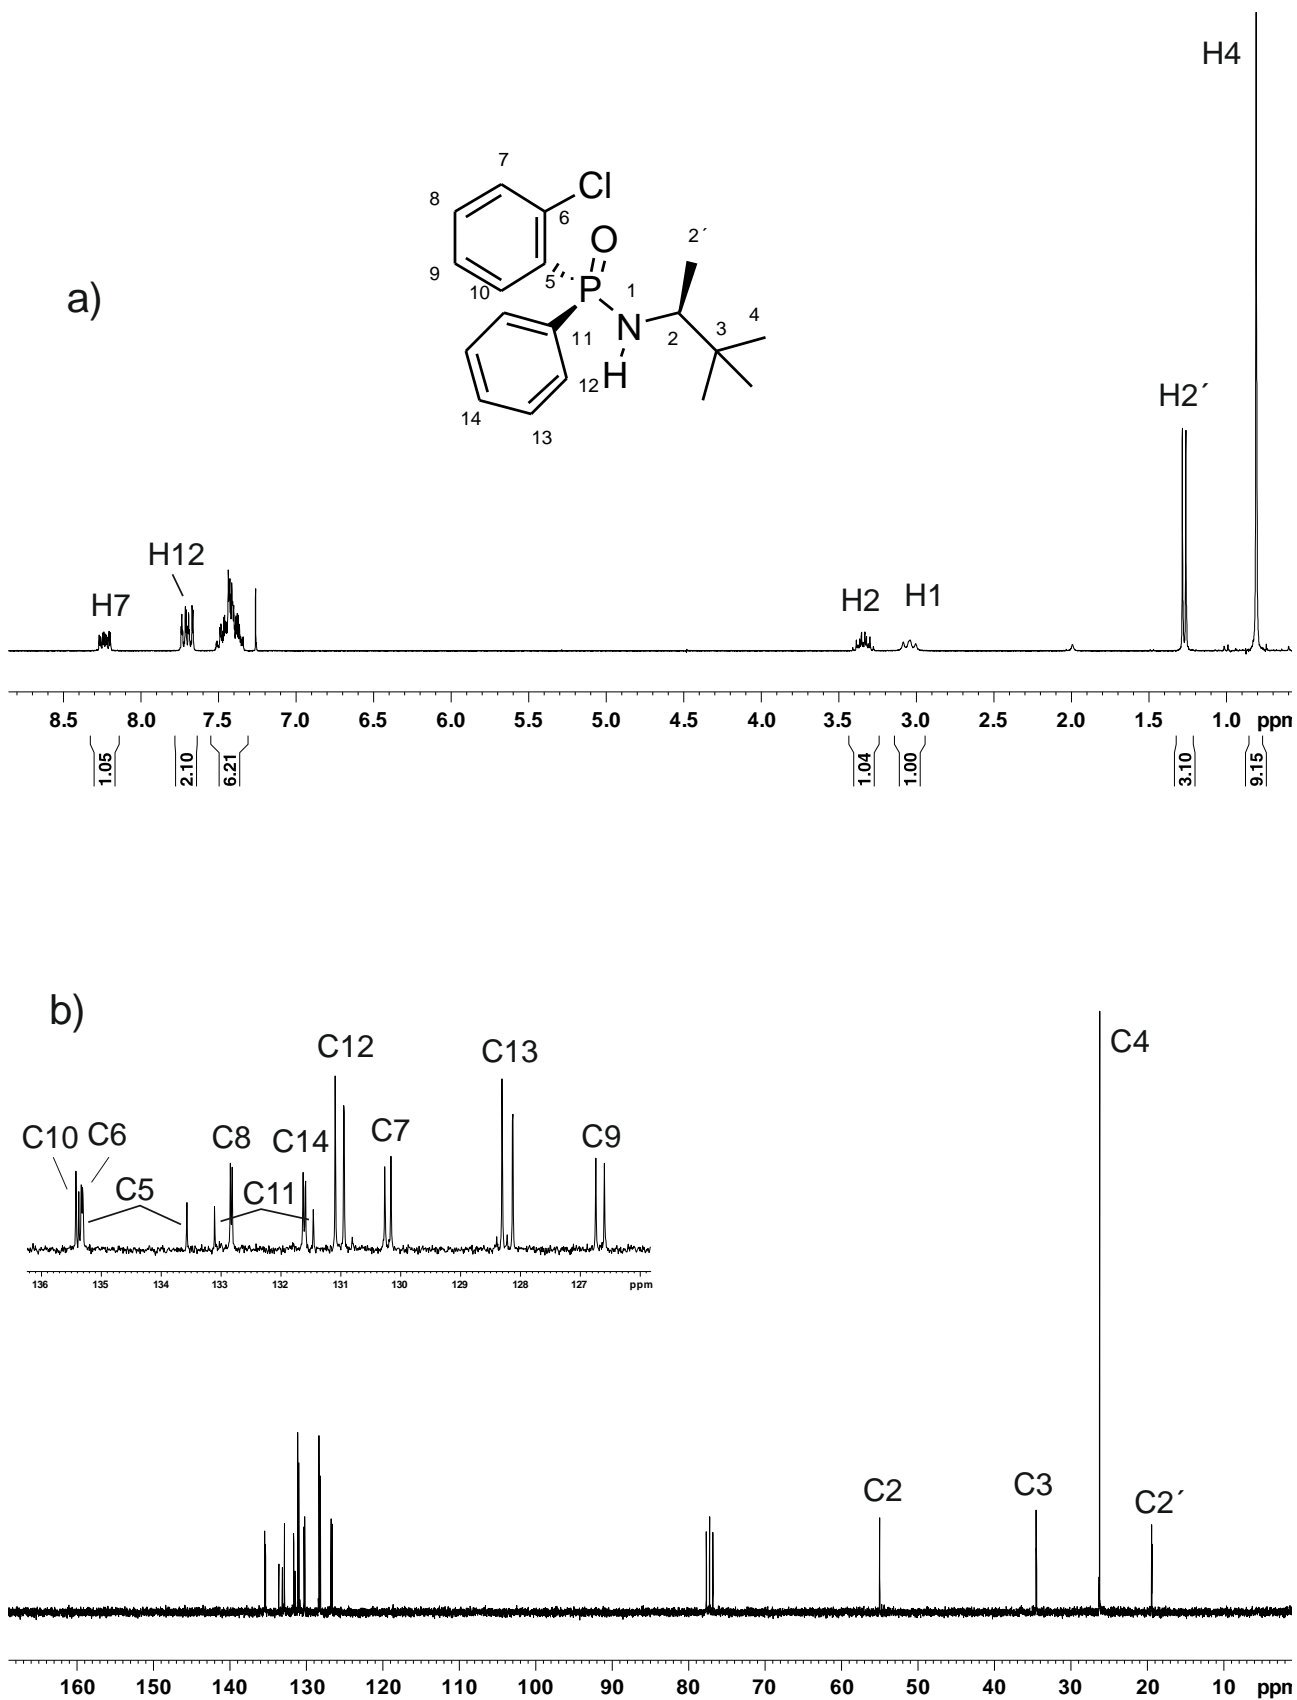

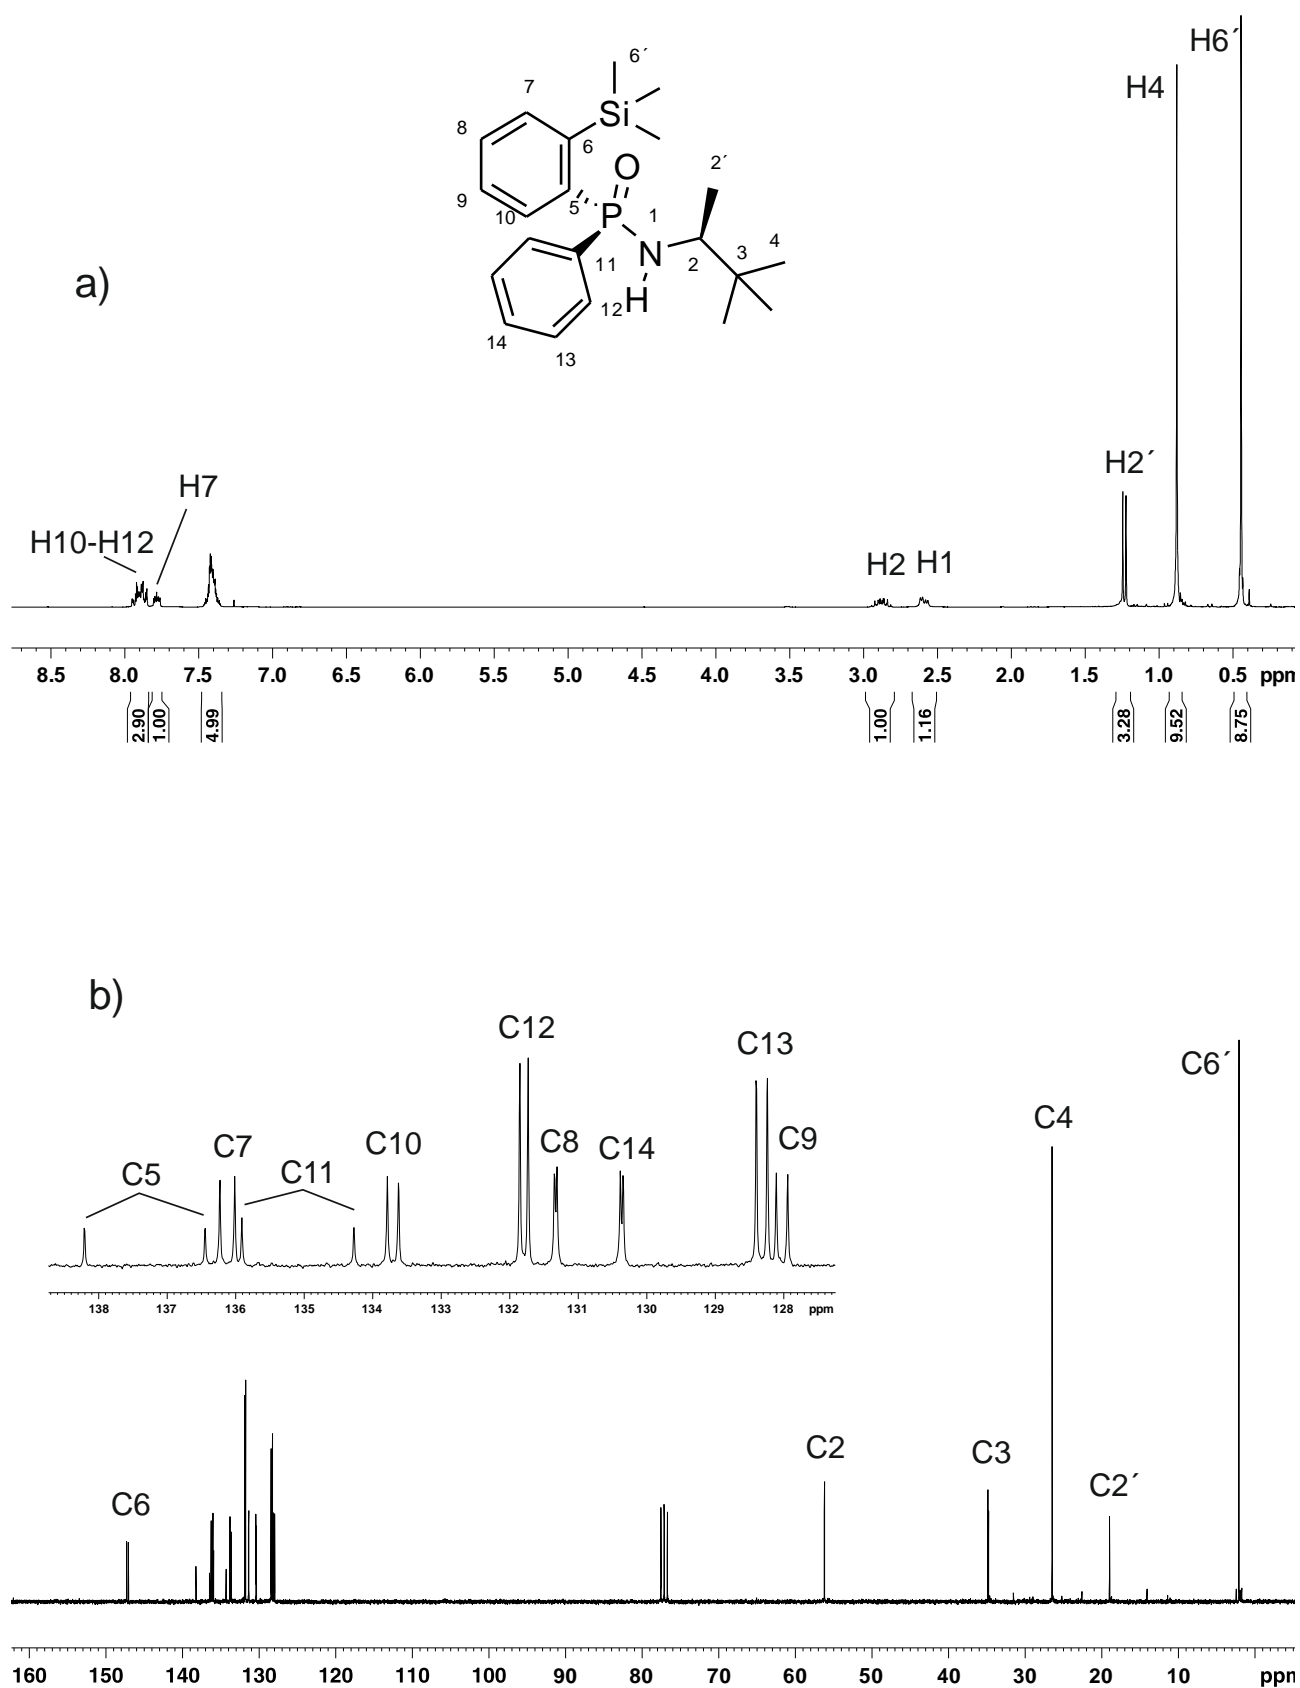

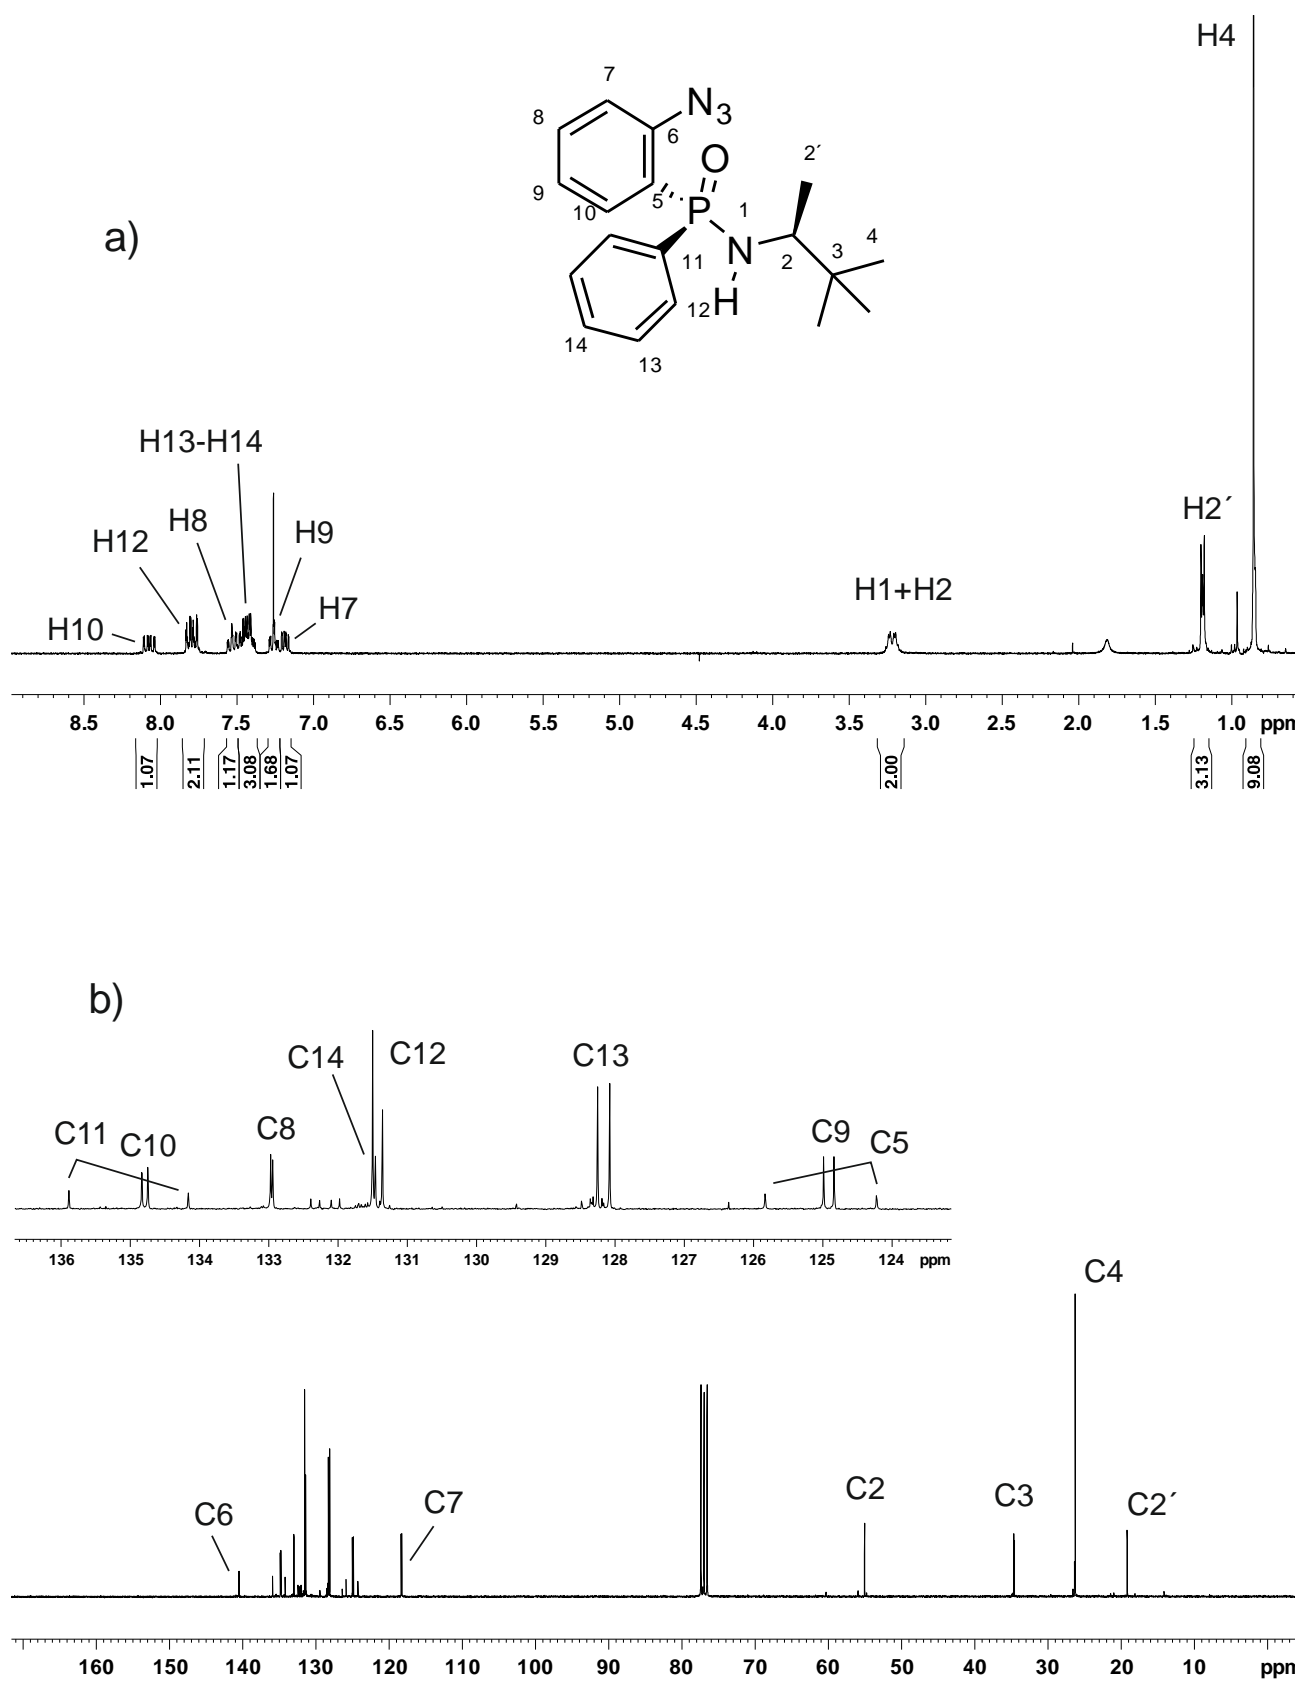

**Figure S10.** (a)  $^1\text{H}$  (300.13 MHz) and (b)  $^{13}\text{C}$  (75.47 MHz) NMR spectra of compound **24**

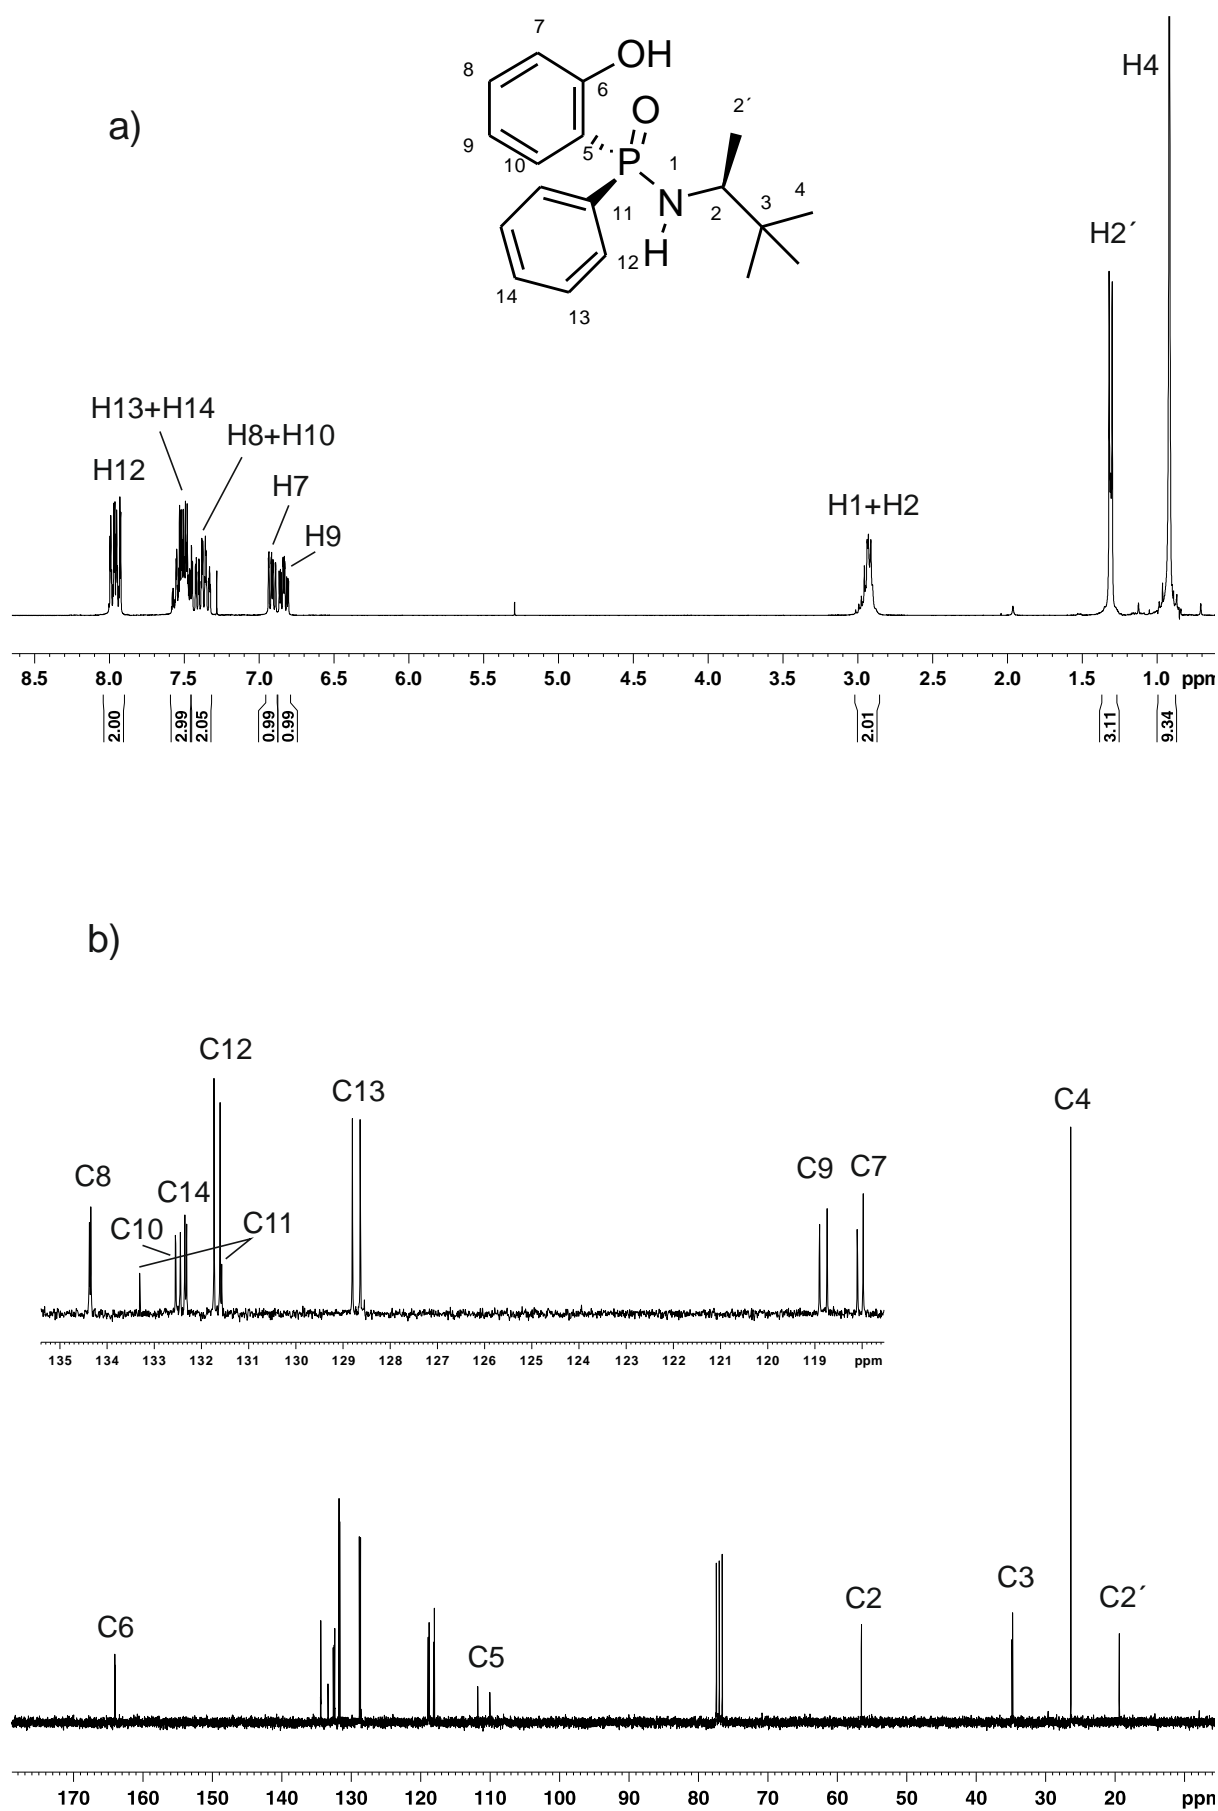

**Figure S11.** (a)  $^1\text{H}$  (300.13 MHz) and (b)  $^{13}\text{C}$  (75.47 MHz) NMR spectra of compound **25**

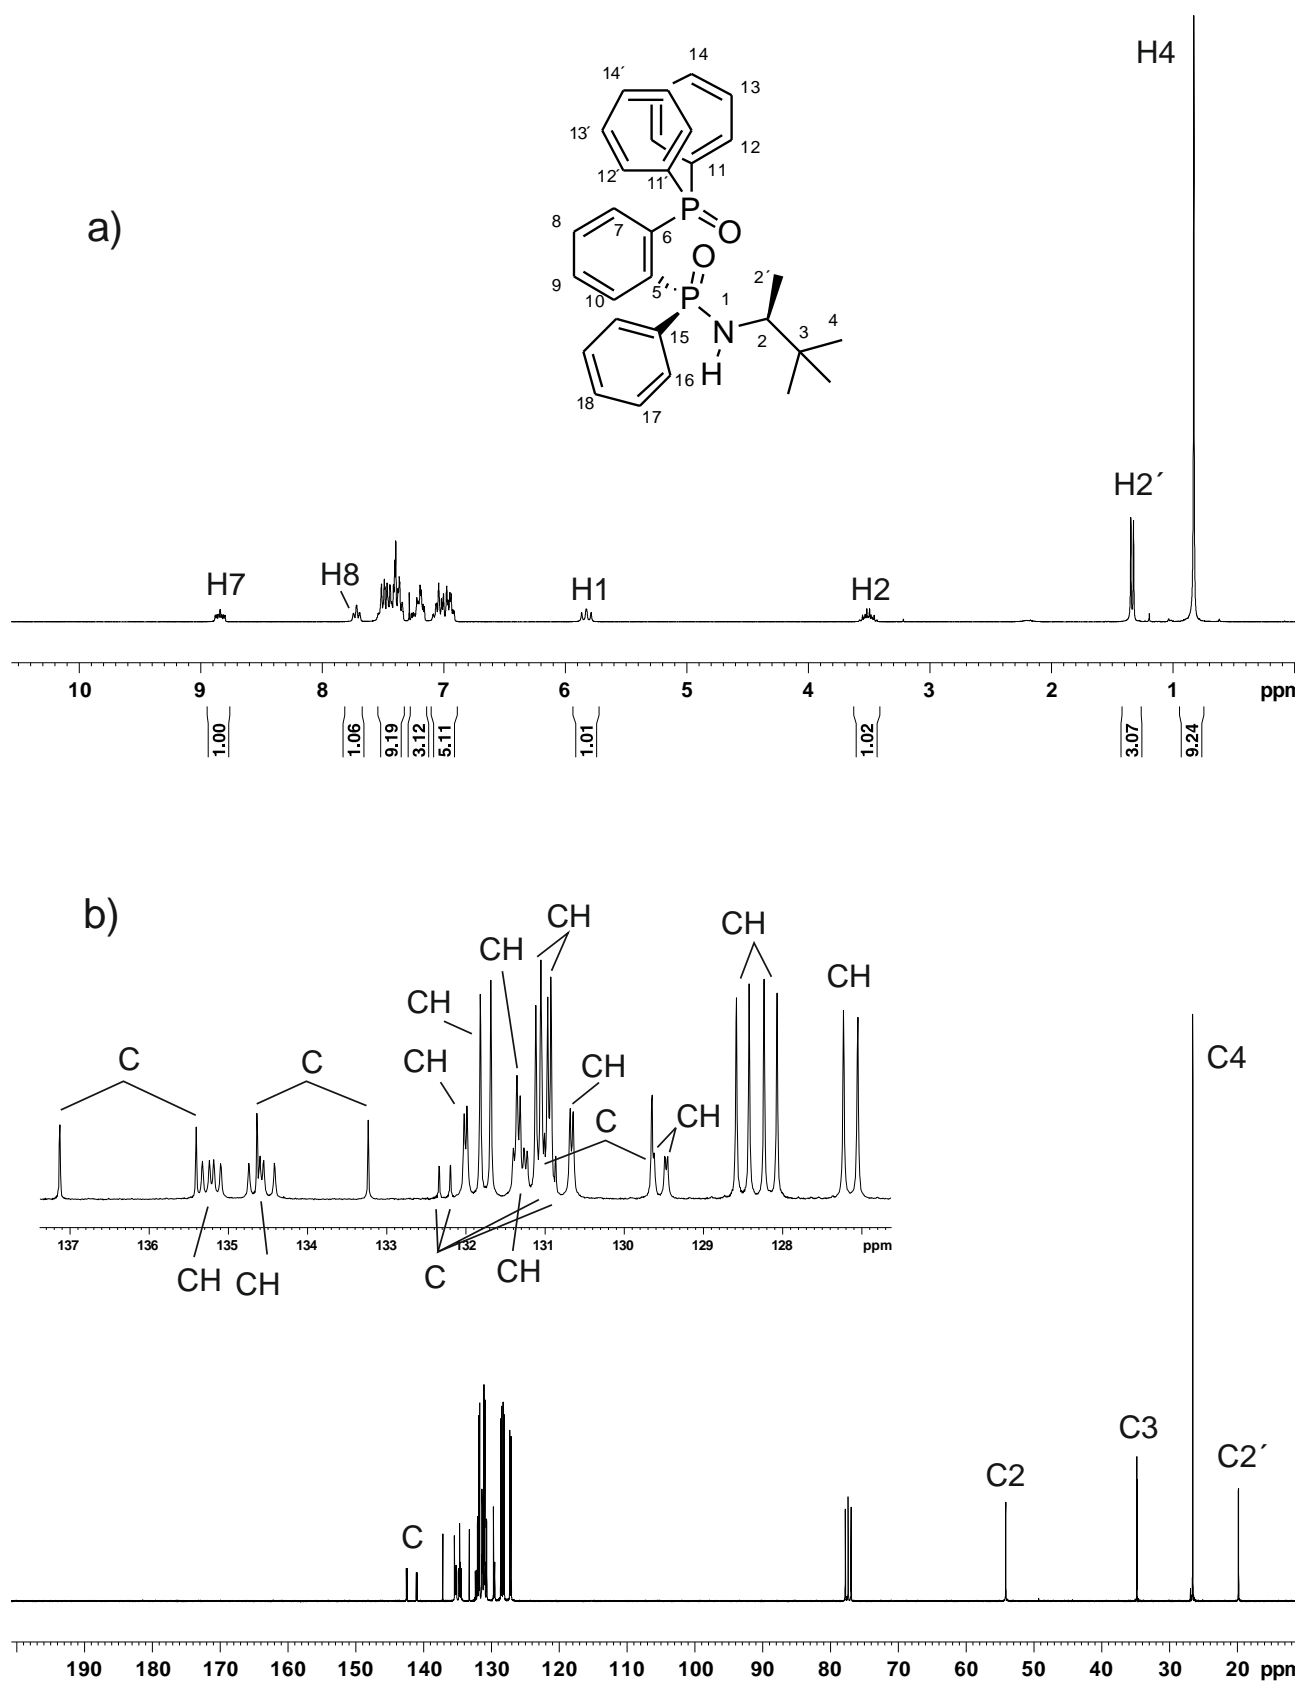

**Figure S12.** (a)  $^1\text{H}$  (300.13 MHz) and (b)  $^{13}\text{C}$  (75.47 MHz) NMR spectra of compound **26**

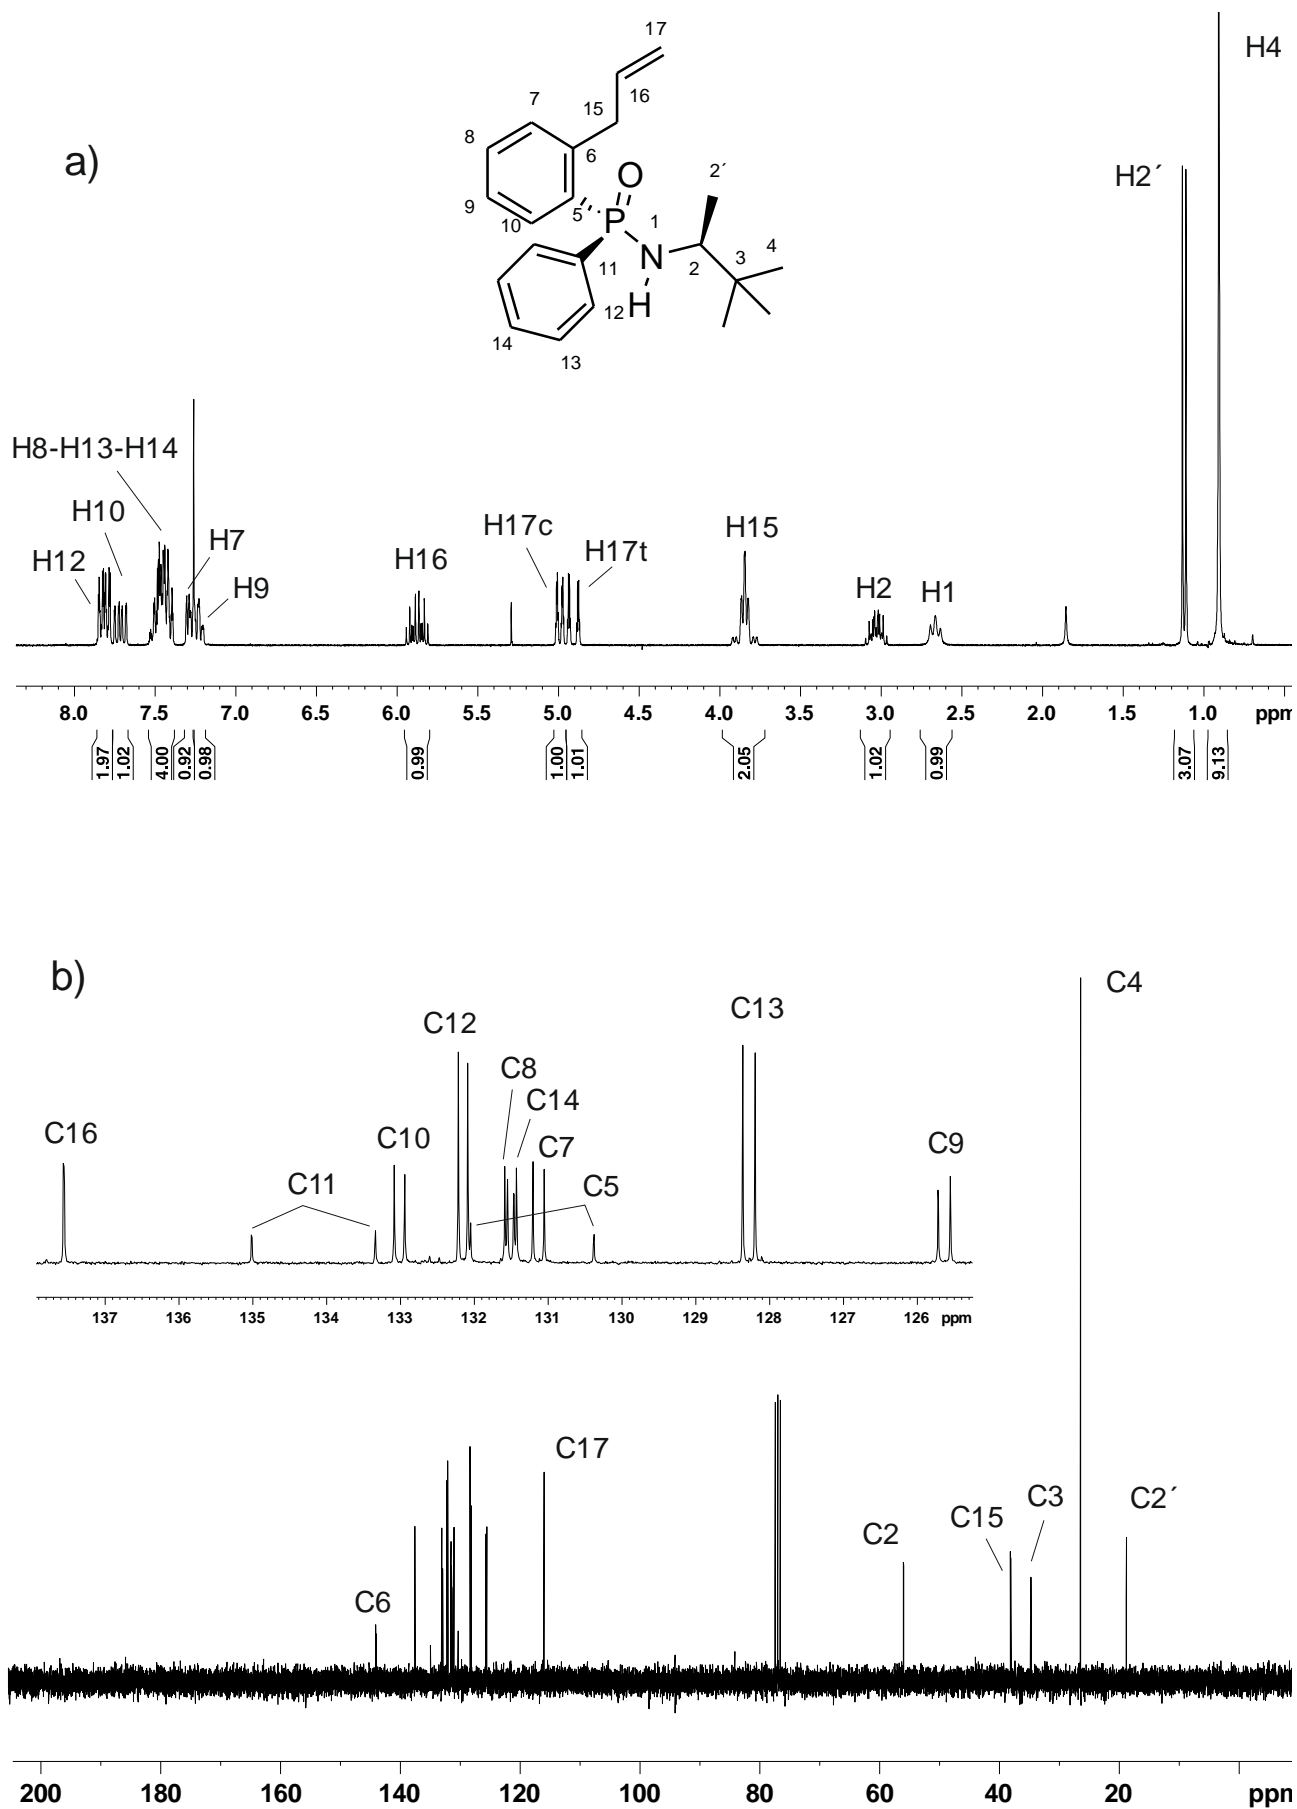

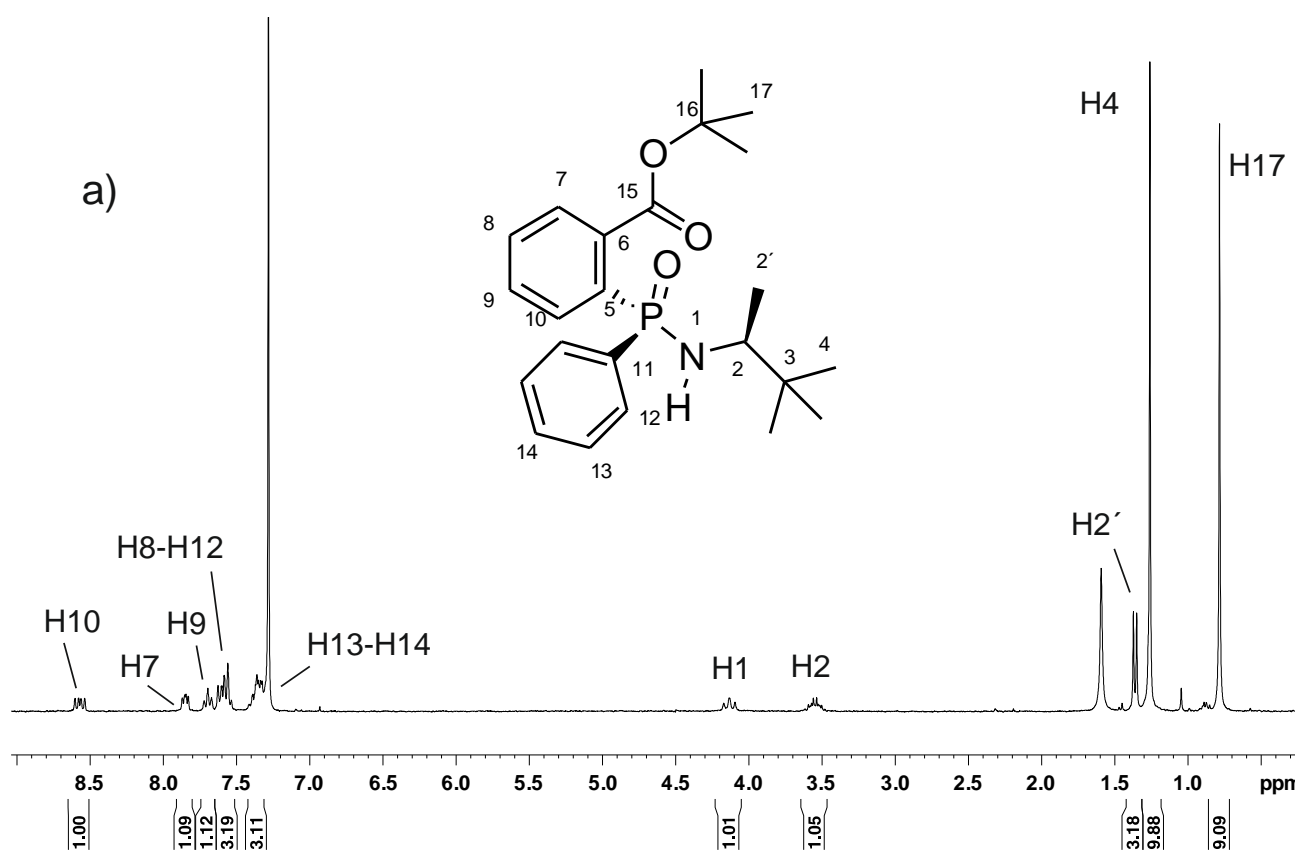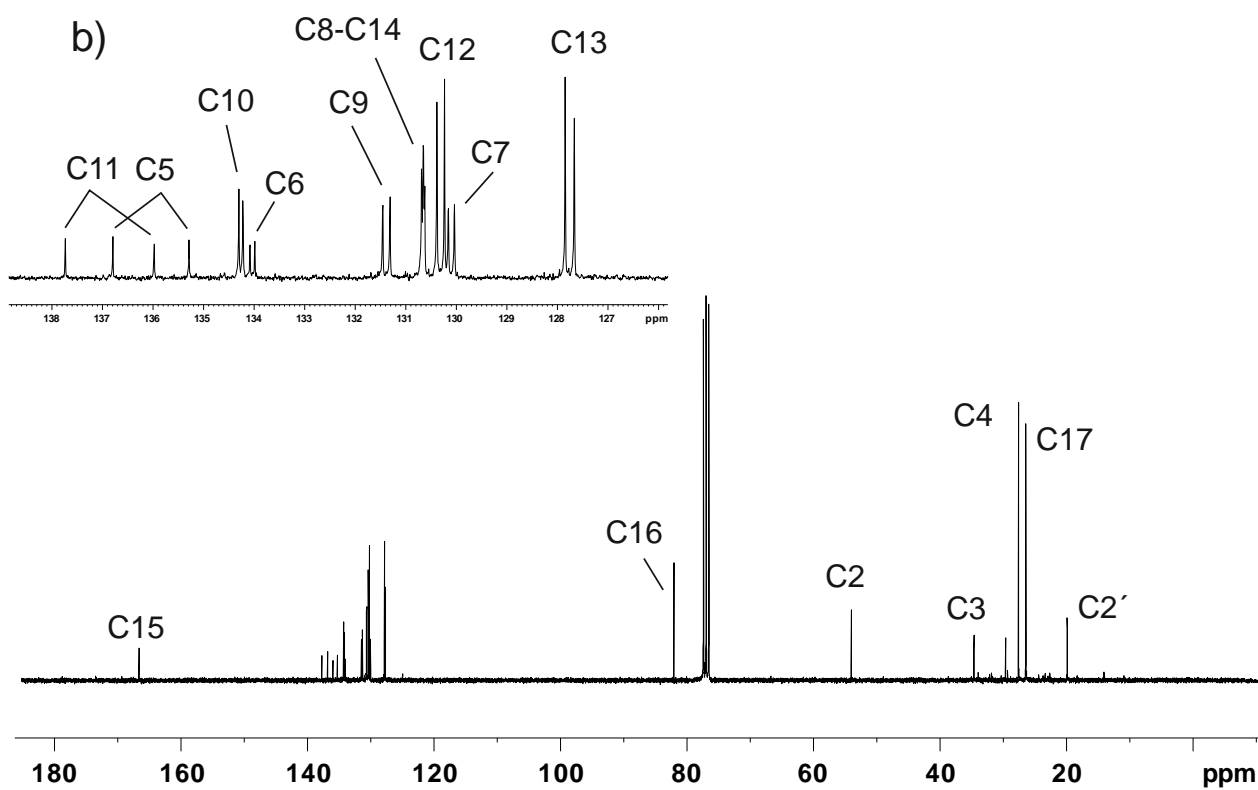

Figure S14. (a)  $^1\text{H}$  (300.13 MHz) and (b)  $^{13}\text{C}$  (75.47 MHz) NMR spectra of compound **28**



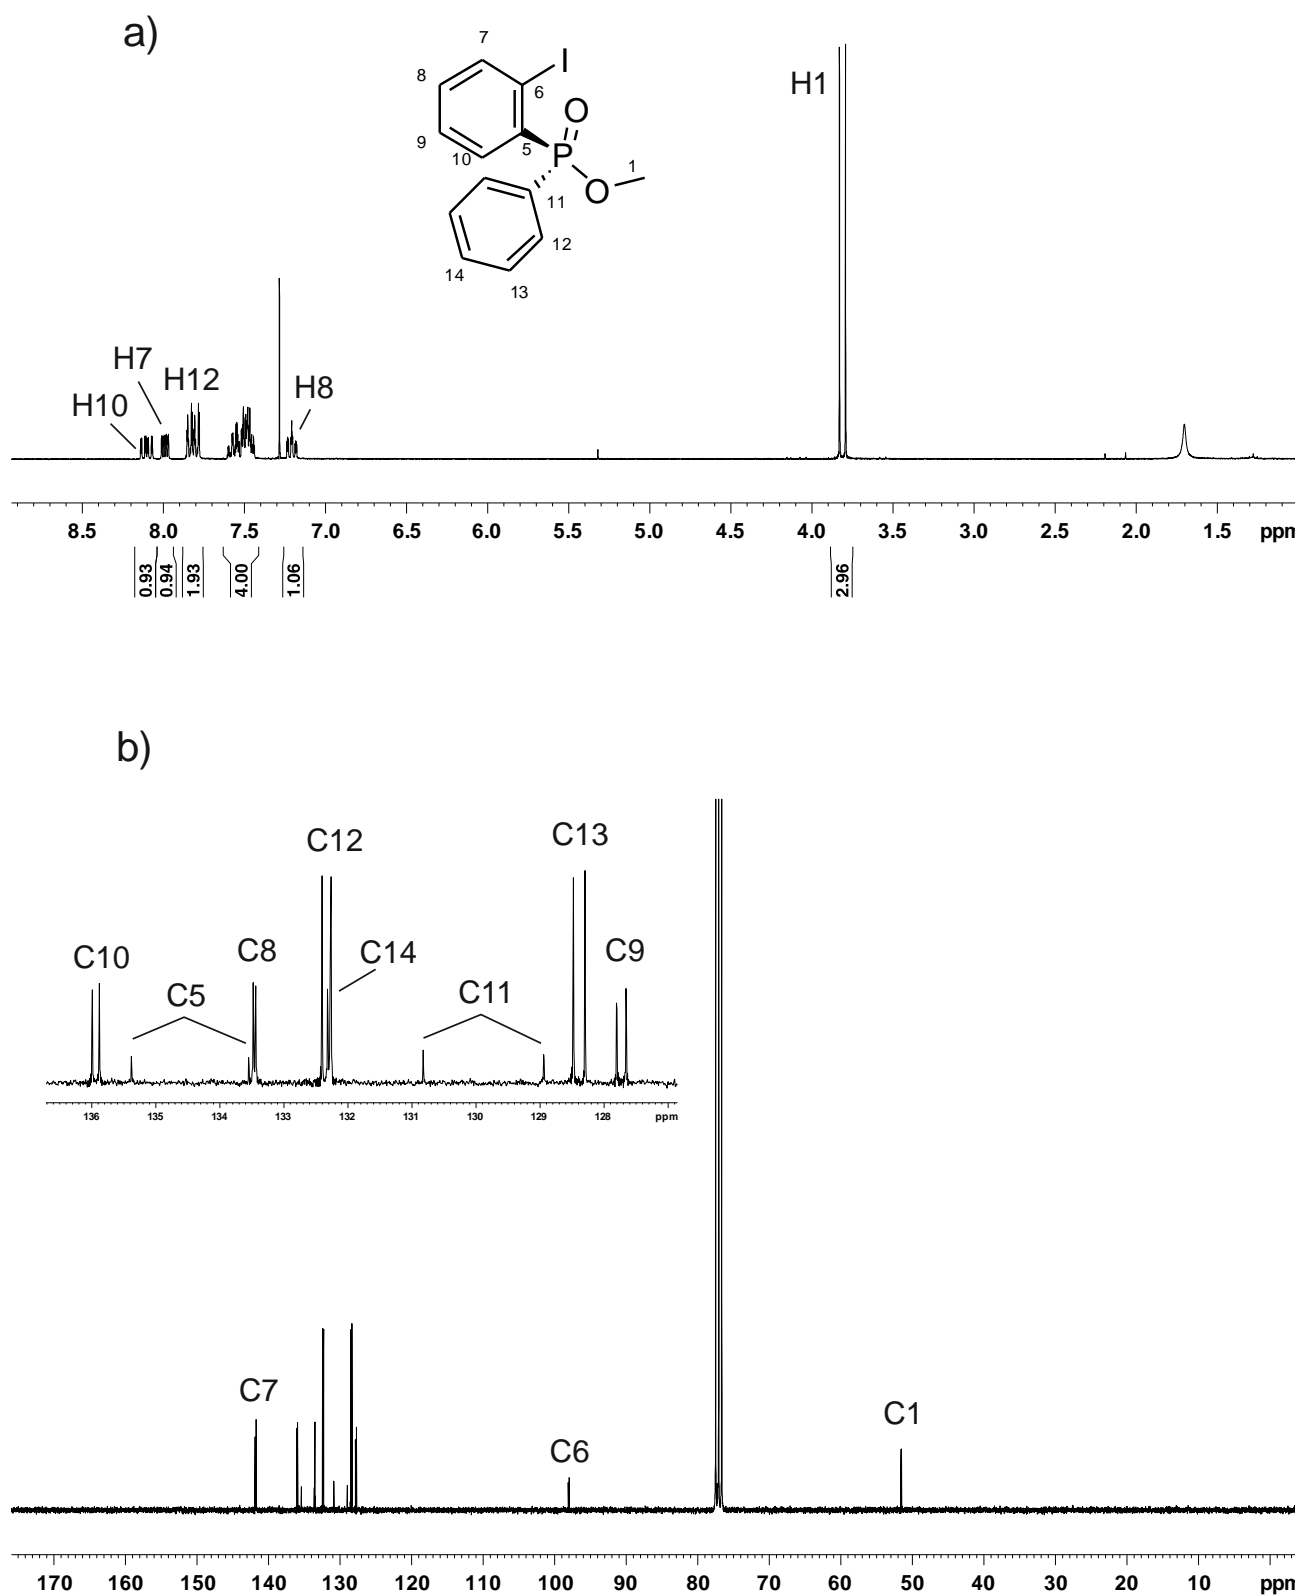

Figure S15. (a)  $^1\text{H}$  (300.13 MHz) and (b)  $^{13}\text{C}$  (75.47 MHz) NMR spectra of compound 29

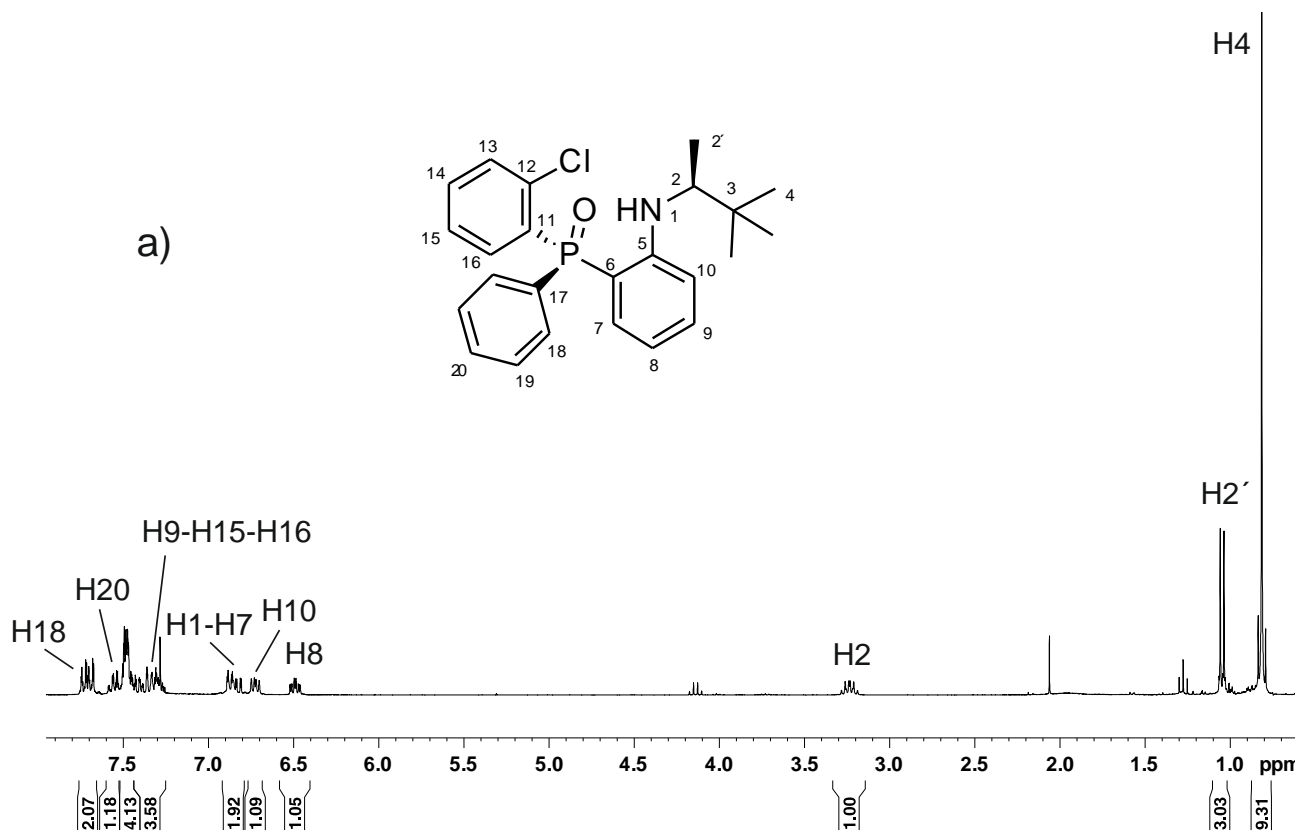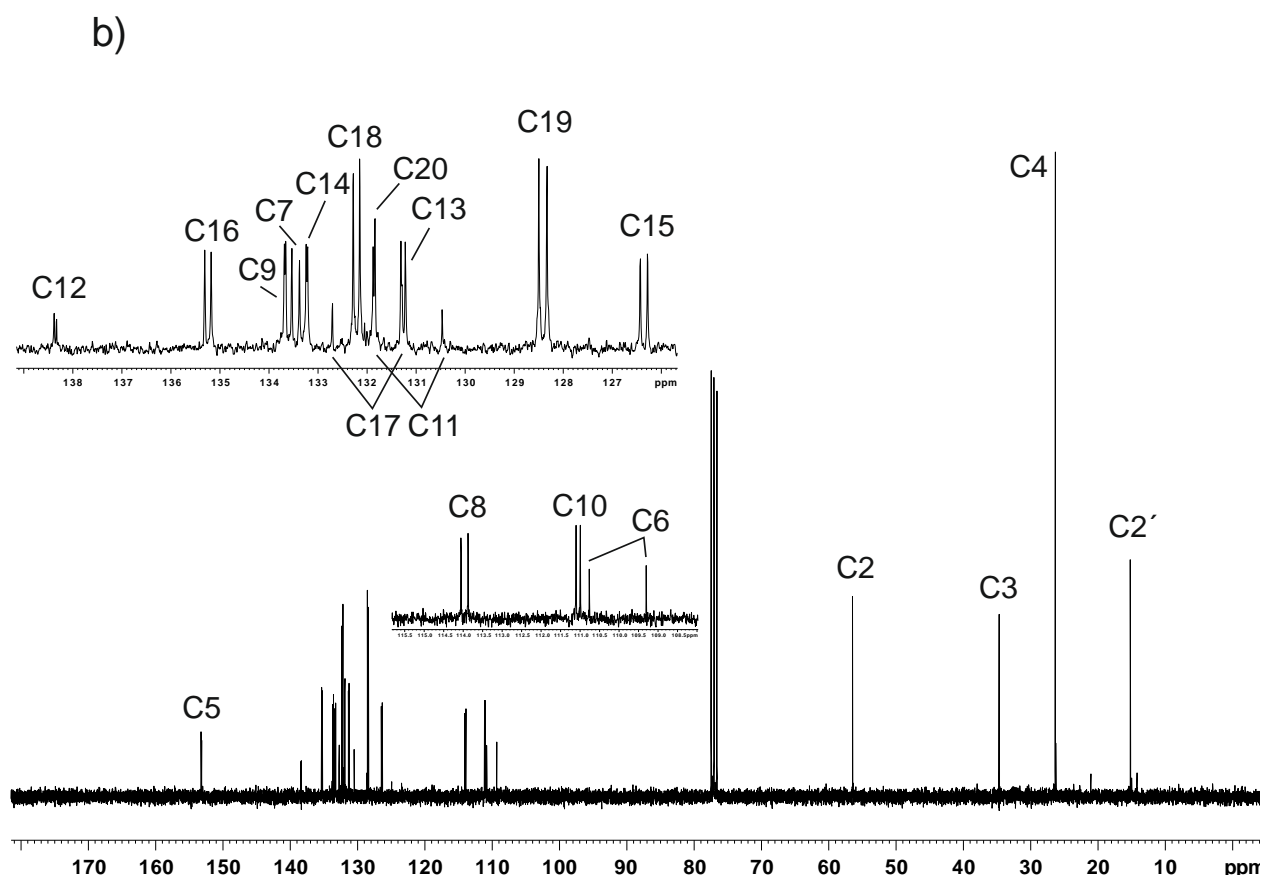

Figure S16. (a)  $^1\text{H}$  (300.13 MHz) and (b)  $^{13}\text{C}$  (75.47 MHz) NMR spectra of compound **32**

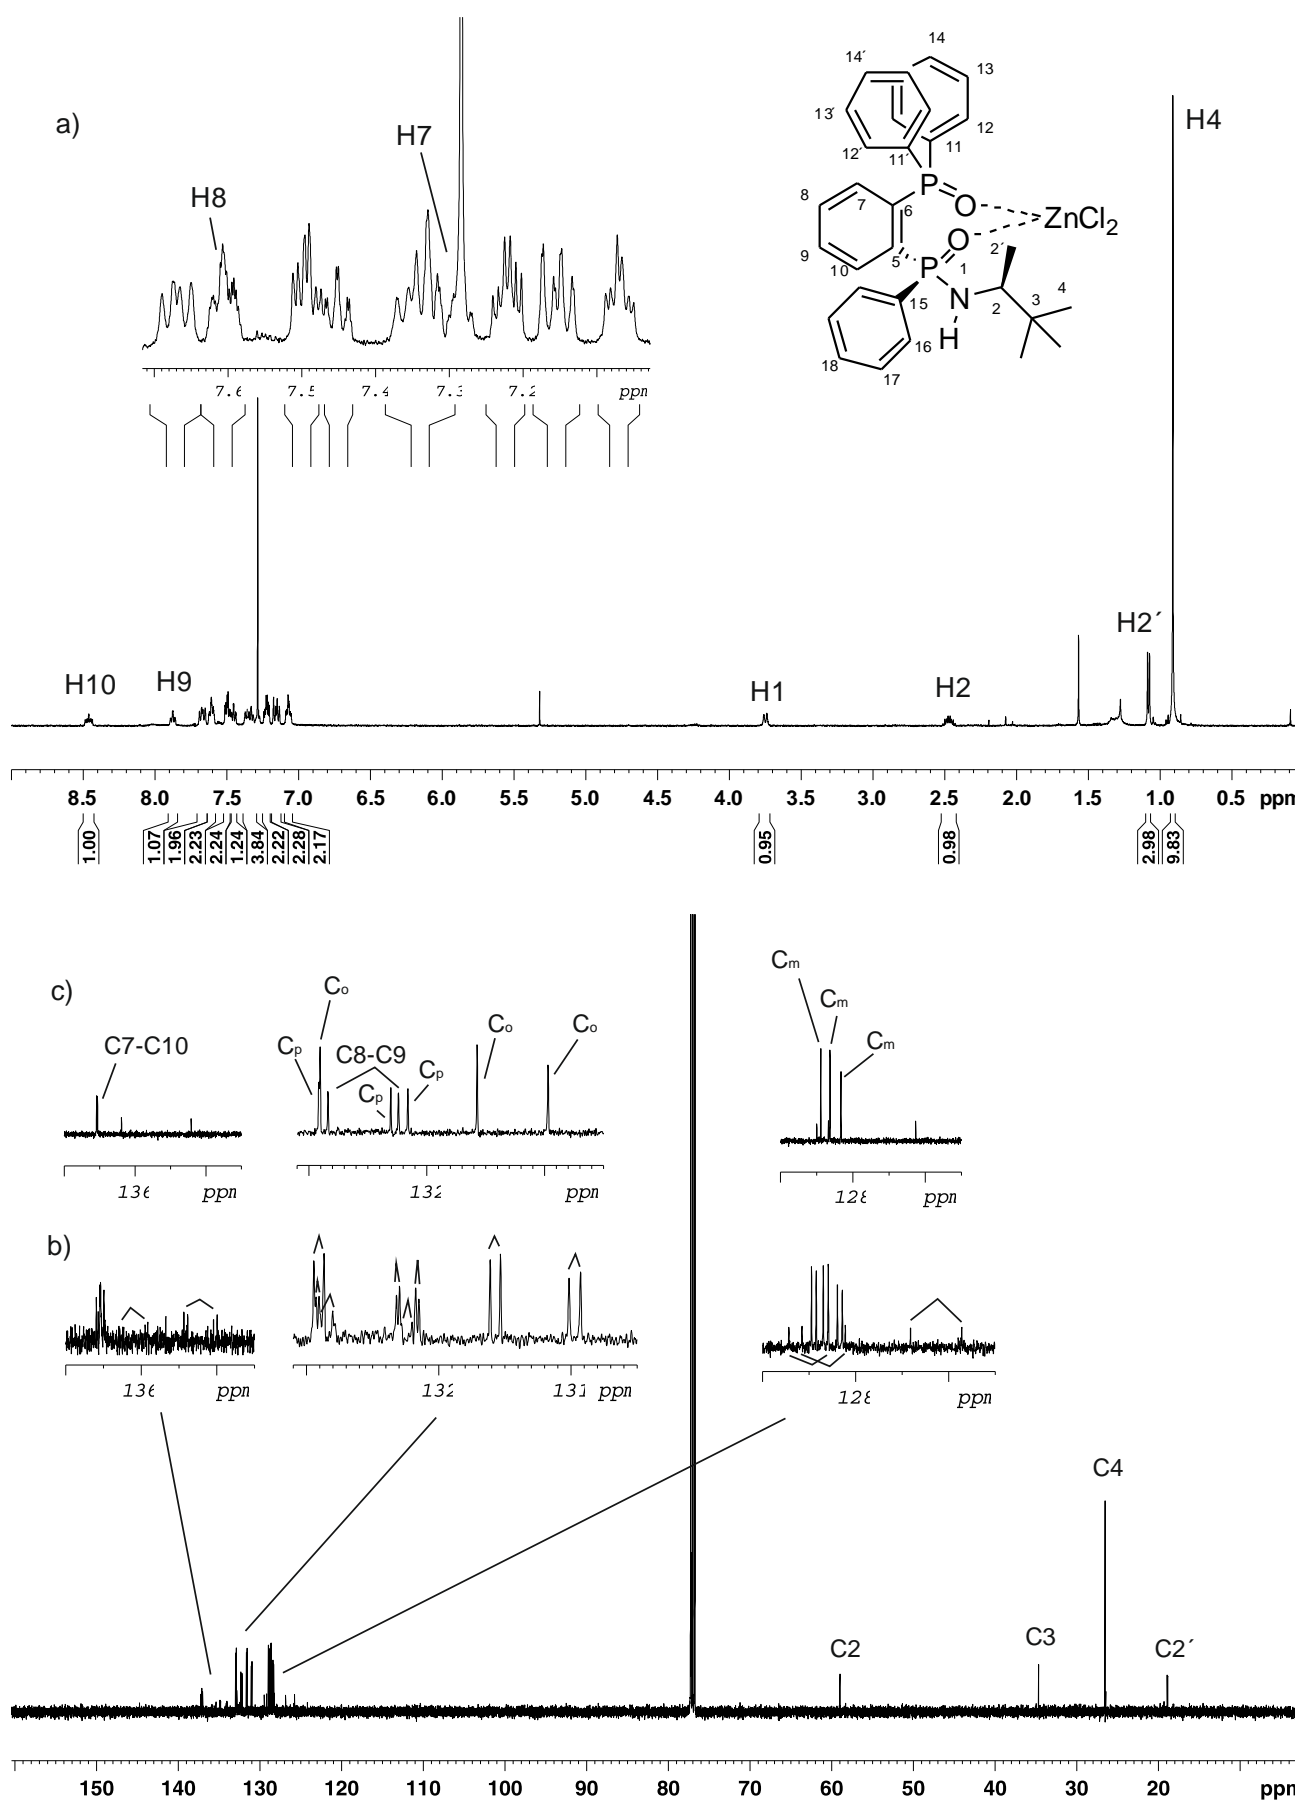

Figure S17. (a)  $^1\text{H}$  (500.13 MHz), (b)  $^{13}\text{C}$  and (c)  $^{13}\text{C}\{^{31}\text{P}\}$  (125.76 MHz) NMR spectra of complex **34**.

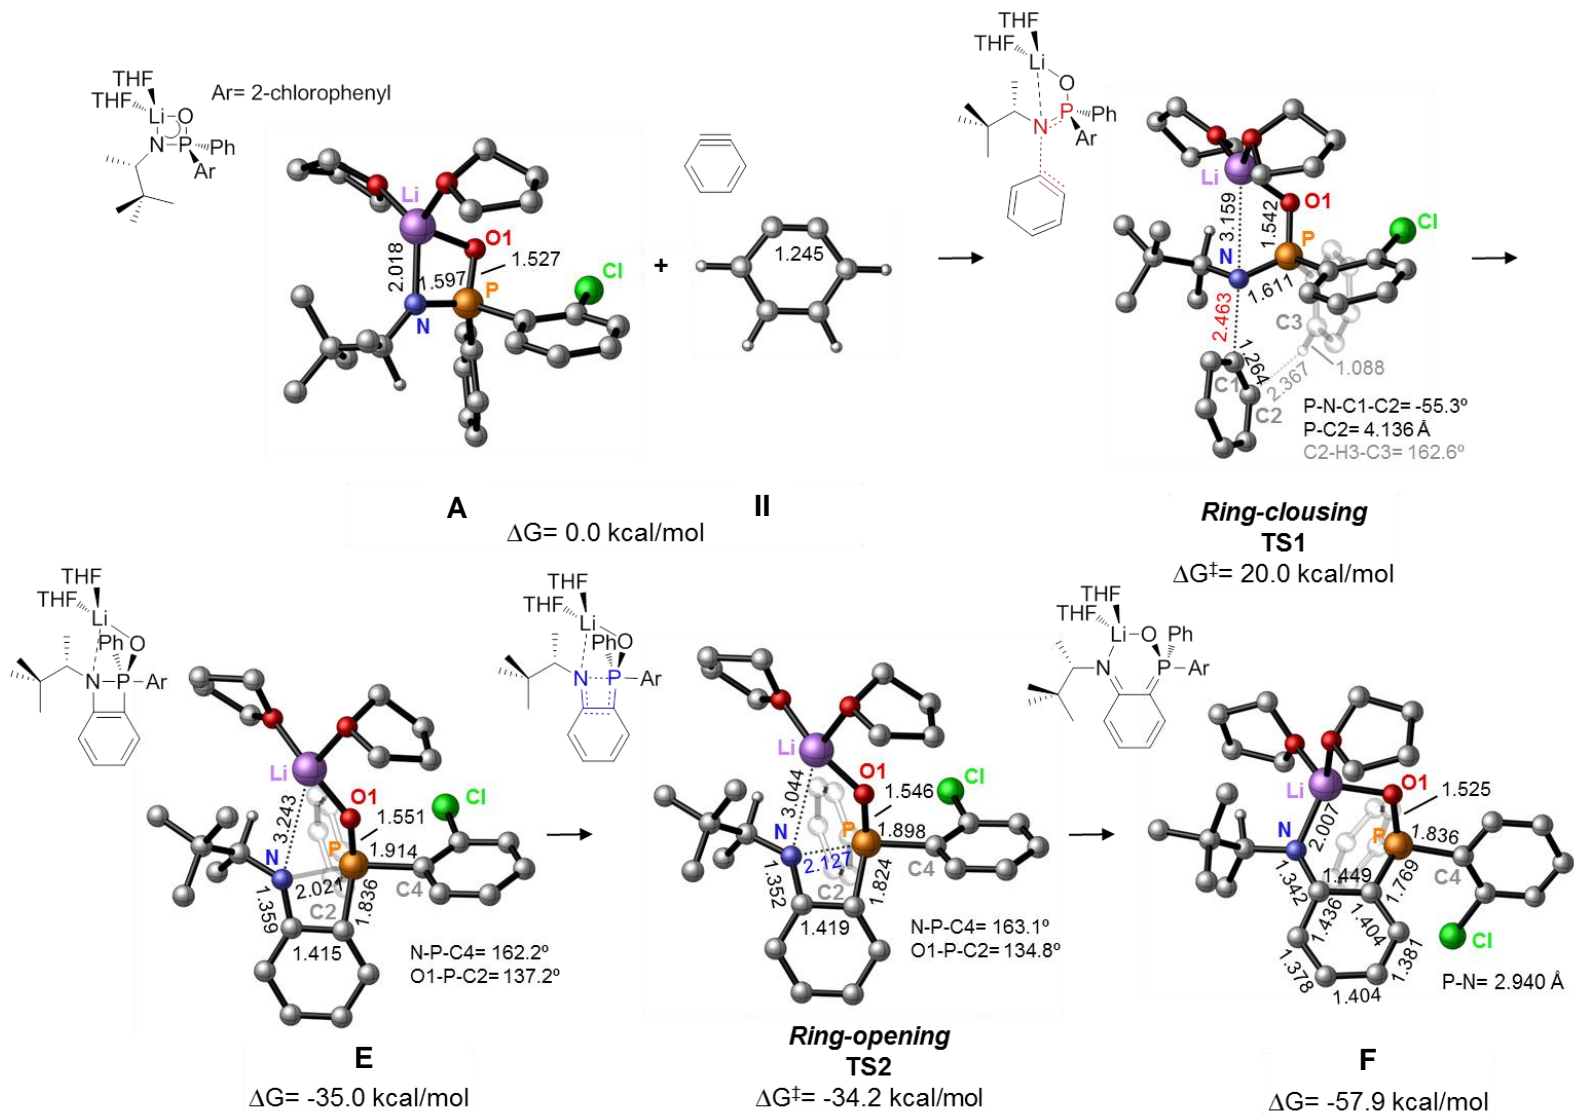

**Figure S18.** Computed structures for the reaction between **A** and benzyne **II**.

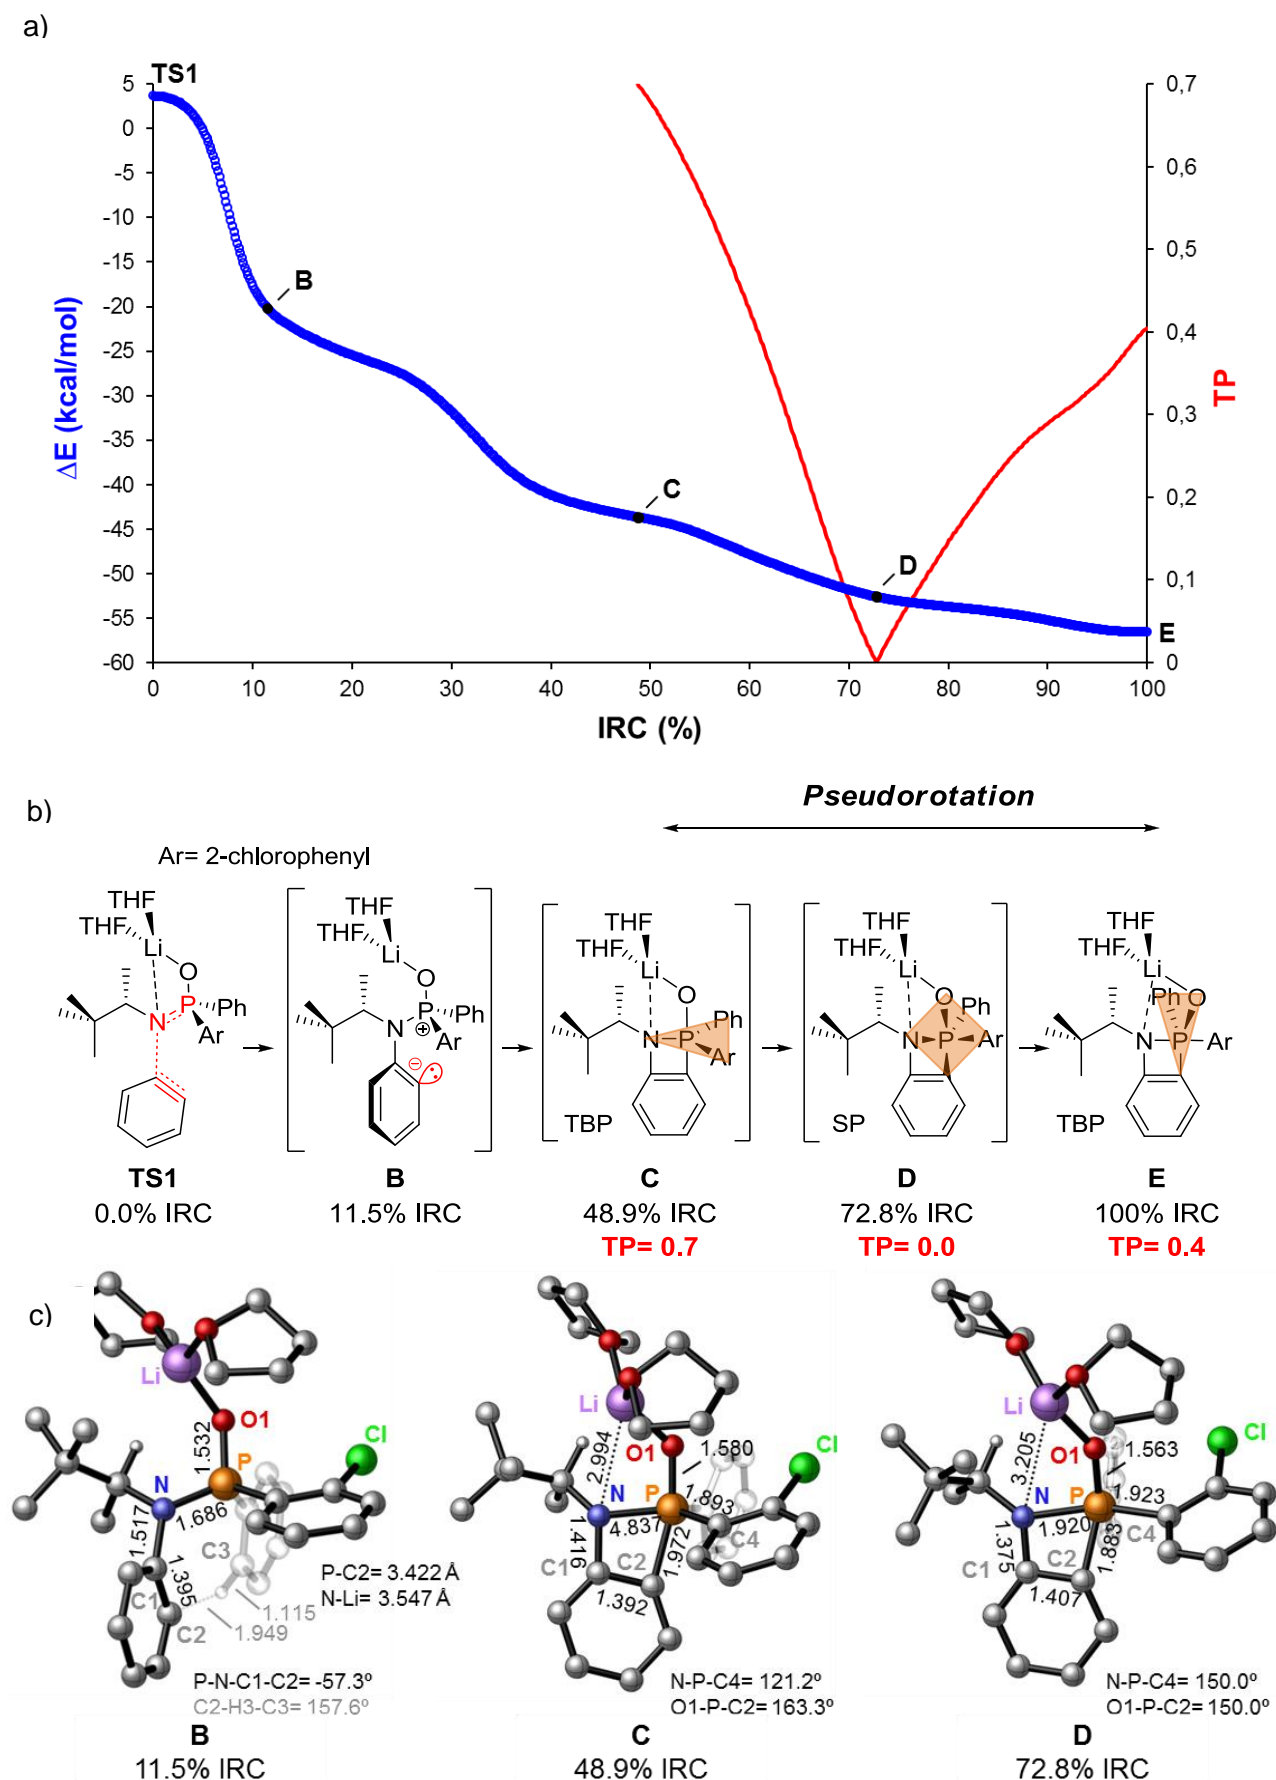

**Figure S19.** (a) Graph of relative energy  $\Delta E$  (blue) and TP (red) along the IRC for the transformation of **TS1** into intermediate **E**. (b) Key structures found along the IRC. (c) Computed structures of species **B**, **C** and **D** including selected geometrical parameters.

**Table S1.** The Cartesian coordinates (Å), SCF energies, enthalpies at 333 K, and Gibbs free energies at 333 K for the optimized structures.

**A**

M06-2X SCF energy  
in gas phase: -2102.63267278 a.u.  
M06-2X enthalpy  
in gas phase : -2101.97811800 a.u.  
M06-2X free energy  
in gas phase: -2102.10430900 a.u.  
M06-2X SCF energy  
in solution: -2103.07697341 a.u.  
M06-2X enthalpy  
in solution: -2102.42241863 a.u.  
M06-2X free energy  
in solution: -2102.54860963 a.u.

Cartesian coordinates

| ATOM | X           | Y           | Z           |
|------|-------------|-------------|-------------|
| Li   | 1.10002700  | -1.50157900 | -0.00509000 |
| O    | -0.11446600 | -0.63339400 | -1.26106800 |
| P    | -0.49391100 | 0.34328100  | -0.15059800 |
| C    | -2.25357500 | 0.04507700  | 0.33966000  |
| C    | -0.56838000 | 2.05103300  | -0.77526100 |
| C    | -3.31561300 | -0.06895800 | -0.56450100 |
| C    | -2.55424500 | -0.08606000 | 1.69866100  |
| C    | -1.17138400 | 3.07333900  | -0.03831500 |
| C    | 0.06568300  | 2.35038500  | -1.98257800 |
| C    | -4.61293600 | -0.34134400 | -0.13915300 |
| C    | -3.84736300 | -0.34201200 | 2.14626600  |
| H    | -1.73871400 | 0.00767500  | 2.40820900  |
| C    | -1.11721300 | 4.38869800  | -0.49232600 |
| H    | -1.69196500 | 2.84054600  | 0.88856900  |
| C    | 0.11833500  | 3.66456200  | -2.43698200 |
| H    | 0.50441800  | 1.53832200  | -2.55696500 |
| C    | -4.87687200 | -0.48000200 | 1.22046500  |
| H    | -5.40512700 | -0.43595800 | -0.87406600 |
| H    | -4.04760000 | -0.43792400 | 3.20869800  |
| C    | -0.46680600 | 4.68447900  | -1.68851000 |
| H    | -1.58568700 | 5.18161400  | 0.08288200  |
| H    | 0.60954300  | 3.89559000  | -3.37757200 |
| H    | -5.88981500 | -0.68961200 | 1.54996800  |
| H    | -0.42551300 | 5.70997200  | -2.04329100 |
| N    | 0.50685100  | 0.10013500  | 1.07010600  |
| C    | 0.88573100  | 0.93587000  | 2.19260300  |
| H    | 0.20856500  | 1.80377500  | 2.30444400  |
| C    | 0.78895700  | 0.10656800  | 3.48194600  |
| H    | -0.22245800 | -0.28792500 | 3.61003500  |
| H    | 1.03483700  | 0.68512100  | 4.37667900  |
| H    | 1.46003400  | -0.75741200 | 3.42527500  |
| C    | 2.31271100  | 1.55617300  | 2.01732800  |
| C    | 3.36726800  | 0.46774800  | 1.79234600  |
| H    | 3.11933300  | -0.11631500 | 0.89922700  |
| H    | 3.44605000  | -0.21632500 | 2.64458500  |
| H    | 4.35365800  | 0.92459400  | 1.64324400  |
| C    | 2.32194900  | 2.48792500  | 0.80275300  |
| H    | 2.09572000  | 1.93679100  | -0.11381900 |
| H    | 3.30783700  | 2.95406700  | 0.68858700  |
| H    | 1.57696600  | 3.28696700  | 0.90101000  |
| C    | 2.68861300  | 2.38158900  | 3.25604700  |
| H    | 1.88798800  | 3.08443900  | 3.51813300  |
| H    | 3.59385500  | 2.96720000  | 3.06029600  |
| H    | 2.88834100  | 1.75195800  | 4.12835000  |
| O    | 2.71400700  | -1.77194900 | -0.98666200 |
| C    | 3.96177500  | -2.32925100 | -0.55284500 |
| C    | 2.92852600  | -0.76149000 | -1.99027900 |
| C    | 5.03935200  | -1.42697300 | -1.14902000 |

|    |             |             |             |
|----|-------------|-------------|-------------|
| H  | 4.03559300  | -3.35441800 | -0.93381900 |
| H  | 3.96823200  | -2.35550500 | 0.54075200  |
| C  | 4.36998700  | -0.96004700 | -2.44485300 |
| H  | 2.78032600  | 0.22330100  | -1.52835100 |
| H  | 2.17450500  | -0.89790700 | -2.76673800 |
| H  | 5.22175400  | -0.57170100 | -0.48990600 |
| H  | 5.98342300  | -1.95269600 | -1.30728700 |
| H  | 4.80737100  | -0.04682200 | -2.85373100 |
| H  | 4.42613300  | -1.74427700 | -3.20726900 |
| O  | 0.31936100  | -3.22092900 | 0.40329400  |
| C  | -0.16255000 | -3.80442700 | -0.81438300 |
| C  | -0.74841000 | -3.19399500 | 1.36952000  |
| C  | -1.63532500 | -3.42428600 | -0.86684200 |
| H  | -0.01800400 | -4.89298100 | -0.77371000 |
| H  | 0.43142300  | -3.38493300 | -1.63034500 |
| C  | -2.04526800 | -3.52468900 | 0.60927100  |
| H  | -0.75130600 | -2.19116400 | 1.80621600  |
| H  | -0.52939000 | -3.92663600 | 2.15348800  |
| H  | -1.71707700 | -2.39652500 | -1.22946600 |
| H  | -2.21773200 | -4.08505900 | -1.51349100 |
| H  | -2.85359100 | -2.83358500 | 0.86397300  |
| H  | -2.37709300 | -4.54001400 | 0.84791800  |
| Cl | -3.06312200 | 0.13464800  | -2.27987200 |

**II**

M06-2X SCF energy  
in gas phase: -230.80521790 a.u.  
M06-2X enthalpy  
in gas phase : -230.72238800 a.u.  
M06-2X free energy  
in gas phase: -230.76005300 a.u.  
M06-2X SCF energy  
in solution: -230.87481087 a.u.  
M06-2X enthalpy  
in solution: -230.79198097 a.u.  
M06-2X free energy  
in solution: -230.82964597 a.u.

Cartesian coordinates

| ATOM | X           | Y           | Z           |
|------|-------------|-------------|-------------|
| C    | -1.46080500 | -0.13246700 | -0.00001000 |
| C    | -0.62234600 | -1.23245600 | 0.00000600  |
| C    | 0.62244200  | -1.23246500 | 0.00000700  |
| C    | 1.46079900  | -0.13238200 | -0.00001000 |
| C    | 0.70287800  | 1.05274600  | 0.00000200  |
| C    | -0.70294700 | 1.05270600  | 0.00000300  |
| H    | -2.54474800 | -0.13327500 | -0.00000500 |
| H    | 2.54474400  | -0.13310800 | -0.00000800 |
| H    | 1.22432100  | 2.00617700  | 0.00001400  |
| H    | -1.22444600 | 2.00610600  | 0.00001000  |

**TS1**

*Ring-closing*

M06-2X SCF energy  
in gas phase: -2333.43213250 a.u.  
M06-2X enthalpy  
in gas phase : -2332.69339400 a.u.  
M06-2X free energy  
in gas phase: -2332.83342500 a.u.  
M06-2X SCF energy  
in solution: -2333.94506493 a.u.  
M06-2X enthalpy  
in solution: -2333.20632643 a.u.

in solution:

M06-2X free energy

in solution: -2333.34635743 a.u.

Imaginary frequency: -88.7995 cm<sup>-1</sup>

Cartesian coordinates

| ATOM | X           | Y           | Z           |
|------|-------------|-------------|-------------|
| P    | -0.25387900 | 0.38241500  | 0.50324700  |
| C    | -0.57670400 | 0.25604600  | 2.29776000  |
| C    | -1.68798300 | -0.44879900 | 2.76653500  |
| C    | 0.32613700  | 0.80720700  | 3.21104100  |
| C    | -1.89635400 | -0.59115100 | 4.13584300  |
| H    | -2.37470500 | -0.91288900 | 2.06100500  |
| C    | 0.12262400  | 0.65390000  | 4.57965100  |
| C    | -0.99108600 | -0.04371100 | 5.04255600  |
| H    | -2.76193100 | -1.14021500 | 4.49421600  |
| H    | 0.82703300  | 1.08474100  | 5.28533400  |
| H    | -1.15259600 | -0.16159200 | 6.11023000  |
| C    | -1.55061500 | 1.48564800  | -0.18674800 |
| C    | -2.27074800 | 1.06264700  | -1.30905400 |
| C    | -1.80392000 | 2.78188500  | 0.27858600  |
| C    | -3.22392600 | 1.86829600  | -1.92161800 |
| H    | -2.05602200 | 0.07568200  | -1.69476000 |
| C    | -2.75144200 | 3.60580100  | -0.32517700 |
| C    | -3.46899200 | 3.14444000  | -1.42316600 |
| H    | -3.77248400 | 1.49659600  | -2.78119900 |
| H    | -2.91742000 | 4.60077300  | 0.07332600  |
| H    | -4.21134800 | 3.78684100  | -1.88664500 |
| O    | 1.09859000  | 1.11593600  | 0.39345800  |
| N    | -0.38822300 | -1.01131700 | -0.29299300 |
| C    | -2.59042800 | -2.09281900 | -0.51175200 |
| C    | -3.32625400 | -2.38700900 | 0.47243000  |
| C    | -2.74904400 | -2.23290900 | -1.87124100 |
| C    | -4.56964000 | -2.97878800 | 0.21789900  |
| C    | -3.98908400 | -2.82425900 | -2.15500300 |
| H    | -2.03612600 | -1.95078000 | -2.63895400 |
| C    | -4.87978700 | -3.18800300 | -1.13134300 |
| H    | -5.27445100 | -3.26843400 | 0.99435400  |
| H    | -4.26065800 | -3.00562800 | -3.19138800 |
| H    | -5.83010600 | -3.64297100 | -1.39915700 |
| C    | 0.69262300  | -1.97194800 | -0.01216800 |
| H    | 1.60900000  | -1.42690400 | 0.30135800  |
| Cl   | -0.93284400 | 3.46161100  | 1.63268400  |
| H    | 1.17149500  | 1.37477100  | 2.83205500  |
| Li   | 2.26936200  | 0.59916700  | -0.86124600 |
| O    | 2.20113200  | 1.73685500  | -2.38814200 |
| C    | 0.86220500  | 1.72534100  | -2.94084300 |
| C    | 2.51375000  | 3.05996800  | -1.91347600 |
| C    | 0.31361500  | 3.14468800  | -2.77480800 |
| H    | 0.92729200  | 1.40244500  | -3.98358400 |
| H    | 0.27535400  | 0.99253300  | -2.37600200 |
| C    | 1.16536600  | 3.70405500  | -1.63115300 |
| H    | 3.14771200  | 2.95203700  | -1.02777300 |
| H    | 3.07327600  | 3.59145000  | -2.69341100 |
| H    | -0.75518100 | 3.14177000  | -2.54557700 |
| H    | 0.47204000  | 3.72554900  | -3.68953500 |
| H    | 0.79384900  | 3.34876800  | -0.66623800 |
| H    | 1.21300900  | 4.79537500  | -1.62480800 |
| O    | 3.91092500  | 0.08415100  | -0.08674500 |
| C    | 3.93214500  | -0.05034600 | 1.34128500  |
| C    | 5.11387000  | -0.49977800 | -0.59547400 |
| C    | 4.49693200  | -1.44773800 | 1.56061500  |
| H    | 4.58867400  | 0.72408700  | 1.76116900  |
| H    | 2.90997300  | 0.10206900  | 1.69225200  |
| C    | 5.53096000  | -1.58318100 | 0.42397500  |
| H    | 4.88997100  | -0.89259600 | -1.59021300 |
| H    | 5.87613600  | 0.28238400  | -0.68744100 |
| H    | 3.69722100  | -2.18579300 | 1.44795600  |

|   |             |             |             |
|---|-------------|-------------|-------------|
| H | 4.93956800  | -1.56792500 | 2.55147600  |
| H | 5.51603800  | -2.58230300 | -0.01704600 |
| H | 6.54420100  | -1.39332500 | 0.78635300  |
| C | 0.32898700  | -2.90795100 | 1.14888900  |
| H | 0.23737900  | -2.33848000 | 2.07761800  |
| H | -0.63708100 | -3.38279400 | 0.95813500  |
| H | 1.08170000  | -3.68991700 | 1.30376700  |
| C | 1.15549100  | -2.76518600 | -1.28062200 |
| C | 0.25281200  | -3.96684500 | -1.58424400 |
| H | -0.79717500 | -3.68015000 | -1.65807700 |
| H | 0.55003300  | -4.43119300 | -2.53208400 |
| H | 0.33550400  | -4.72897500 | -0.80290600 |
| C | 2.58157900  | -3.28703000 | -1.05047900 |
| H | 2.92421400  | -3.86544100 | -1.91648000 |
| H | 3.27666600  | -2.45130100 | -0.90399900 |
| H | 2.64520000  | -3.93820600 | -0.17175600 |
| C | 1.19522500  | -1.83937800 | -2.49817300 |
| H | 1.89888000  | -1.00453300 | -2.34805800 |
| H | 1.54440000  | -2.38281300 | -3.38398500 |
| H | 0.21242300  | -1.40870200 | -2.70089000 |

[B]

Electronic energy from IRC: -2333.47011051 a.u.

Cartesian coordinates

| ATOM | X           | Y           | Z           |
|------|-------------|-------------|-------------|
| P    | -0.42747000 | 0.22716300  | 0.46881100  |
| C    | -0.61190800 | 0.13462300  | 2.27299900  |
| C    | -1.68612600 | -0.56850400 | 2.82334000  |
| C    | 0.33818000  | 0.74180600  | 3.10465400  |
| C    | -1.81307800 | -0.64664100 | 4.20734400  |
| H    | -2.35024900 | -1.14916900 | 2.14153500  |
| C    | 0.20489000  | 0.64660900  | 4.48624000  |
| C    | -0.87650800 | -0.04243000 | 5.03807900  |
| H    | -2.64566700 | -1.19959700 | 4.63298700  |
| H    | 0.93965600  | 1.11451400  | 5.13481000  |
| H    | -0.97764400 | -0.11068200 | 6.11794800  |
| C    | -1.62460500 | 1.41492900  | -0.23460300 |
| C    | -2.33214700 | 1.05826100  | -1.38797900 |
| C    | -1.80380600 | 2.72107500  | 0.24641100  |
| C    | -3.23539300 | 1.92144200  | -1.99430200 |
| H    | -2.19270100 | 0.07258300  | -1.80427800 |
| C    | -2.70769300 | 3.59564700  | -0.35138600 |
| C    | -3.43865600 | 3.18887300  | -1.46187000 |
| H    | -3.78345300 | 1.59198300  | -2.87055000 |
| H    | -2.82931600 | 4.59034400  | 0.06298000  |
| H    | -4.15296800 | 3.87109000  | -1.91189400 |
| O    | 0.97656300  | 0.77638700  | 0.19508200  |
| N    | -0.67130900 | -1.24727000 | -0.31064600 |
| C    | -2.02869900 | -1.89221700 | -0.51660700 |
| C    | -2.85687000 | -2.18150000 | 0.56746500  |
| C    | -2.37842300 | -2.16041800 | -1.85552800 |
| C    | -4.08194600 | -2.79596500 | 0.20262500  |
| C    | -3.60096500 | -2.75377400 | -2.14997000 |
| H    | -1.71407100 | -1.90296700 | -2.68003500 |
| C    | -4.46545900 | -3.08502800 | -1.10275300 |
| H    | -4.78855700 | -3.06052700 | 0.99390200  |
| H    | -3.87044100 | -2.95459700 | -3.18353200 |
| H    | -5.42431700 | -3.55434100 | -1.31740200 |
| C    | 0.49819800  | -2.15513100 | -0.04953400 |
| H    | 1.31520800  | -1.49369900 | 0.27317600  |
| Cl   | -0.88985800 | 3.36381000  | 1.59077700  |
| H    | 1.15904300  | 1.30217500  | 2.66496200  |
| Li   | 2.33048000  | 0.53381500  | -0.93960600 |
| O    | 2.24468700  | 1.69815000  | -2.42959000 |
| C    | 0.90668500  | 1.69269700  | -2.98871800 |
| C    | 2.55852400  | 3.02043900  | -1.95310100 |
| C    | 0.35968900  | 3.11050500  | -2.80834600 |

|   |             |             |             |
|---|-------------|-------------|-------------|
| H | 0.97523400  | 1.37833400  | -4.03327800 |
| H | 0.31576600  | 0.95978200  | -2.42945900 |
| C | 1.20838500  | 3.65260500  | -1.65441800 |
| H | 3.20752500  | 2.91223200  | -1.07808500 |
| H | 3.10441600  | 3.55975100  | -2.73679800 |
| H | -0.70999400 | 3.10630900  | -2.58341400 |
| H | 0.52324100  | 3.70355800  | -3.71398700 |
| H | 0.83384800  | 3.27794200  | -0.69695100 |
| H | 1.24939000  | 4.74351300  | -1.62383100 |
| O | 3.94366500  | 0.02603200  | -0.11648200 |
| C | 3.95701900  | -0.10517100 | 1.31268900  |
| C | 5.15453600  | -0.55336500 | -0.61835500 |
| C | 4.54036600  | -1.49341800 | 1.54575600  |
| H | 4.59673300  | 0.68124400  | 1.73514200  |
| H | 2.92952700  | 0.02773000  | 1.65750900  |
| C | 5.56361100  | -1.64014400 | 0.39920300  |
| H | 4.93850200  | -0.94249800 | -1.61621800 |
| H | 5.91402800  | 0.23225500  | -0.69990600 |
| H | 3.74915200  | -2.24321000 | 1.45974000  |
| H | 4.99621400  | -1.58973200 | 2.53300100  |
| H | 5.52835600  | -2.63852500 | -0.04214800 |
| H | 6.58287700  | -1.46660400 | 0.75178200  |
| C | 0.22054400  | -3.10973300 | 1.11331000  |
| H | 0.06983800  | -2.54114600 | 2.03449700  |
| H | -0.69038700 | -3.68604300 | 0.94038400  |
| H | 1.05986200  | -3.79607300 | 1.26637800  |
| C | 1.07529700  | -2.85949300 | -1.31819600 |
| C | 0.29370700  | -4.12168400 | -1.70440100 |
| H | -0.76049300 | -3.91932600 | -1.89619800 |
| H | 0.73163700  | -4.56834800 | -2.60484700 |
| H | 0.35130600  | -4.86667300 | -0.90458700 |
| C | 2.52592500  | -3.27853100 | -1.01891700 |
| H | 2.96727700  | -3.75575300 | -1.90147300 |
| H | 3.13636300  | -2.40185900 | -0.76738500 |
| H | 2.59335300  | -3.99133800 | -0.19102100 |
| C | 1.14745900  | -1.88429500 | -2.49825100 |
| H | 1.84951300  | -1.06108300 | -2.29079400 |
| H | 1.53106800  | -2.39427700 | -3.38907800 |
| H | 0.18104500  | -1.44028700 | -2.73468200 |

### [C]

Electronic energy from IRC: -2333.50755578 a.u.

Cartesian coordinates

| ATOM | X           | Y           | Z           |
|------|-------------|-------------|-------------|
| P    | -0.82261700 | -0.00539900 | 0.43690500  |
| C    | -0.87016100 | -0.11390500 | 2.29445200  |
| C    | -1.85948400 | -0.79642900 | 3.00920300  |
| C    | 0.16984500  | 0.48885600  | 3.01798000  |
| C    | -1.81168900 | -0.87441100 | 4.40124500  |
| H    | -2.66985800 | -1.28243800 | 2.47931400  |
| C    | 0.21898100  | 0.41413100  | 4.40531100  |
| C    | -0.77462000 | -0.27033600 | 5.10324000  |
| H    | -2.59077200 | -1.41094200 | 4.93460500  |
| H    | 1.02822100  | 0.89836200  | 4.94467000  |
| H    | -0.74094100 | -0.32906000 | 6.18738900  |
| C    | -1.73810800 | 1.45716300  | -0.34068500 |
| C    | -2.41690200 | 1.22894600  | -1.55081000 |
| C    | -1.79747100 | 2.76021800  | 0.15985500  |
| C    | -3.12767600 | 2.22586100  | -2.20858000 |
| H    | -2.40275500 | 0.22908700  | -1.97701000 |
| C    | -2.53071300 | 3.76925800  | -0.46841800 |
| C    | -3.20137000 | 3.50183900  | -1.65422500 |
| H    | -3.63724300 | 1.99991900  | -3.14001600 |
| H    | -2.56881400 | 4.75378100  | -0.01442100 |
| H    | -3.77367400 | 4.28612100  | -2.13965800 |
| O    | 0.61129100  | 0.64271200  | 0.29268600  |
| N    | -0.40627400 | -1.49984500 | -0.54708400 |

|    |             |             |             |
|----|-------------|-------------|-------------|
| C  | -1.72814600 | -2.00270200 | -0.61582800 |
| C  | -2.44967500 | -1.07777200 | 0.13399700  |
| C  | -2.36142700 | -2.99815400 | -1.35591200 |
| C  | -3.83158800 | -1.12731900 | 0.17794200  |
| C  | -3.75878300 | -3.06690200 | -1.26995700 |
| H  | -1.83335700 | -3.67628100 | -2.01462600 |
| C  | -4.48992900 | -2.15778100 | -0.51063100 |
| H  | -4.40639100 | -0.38290800 | 0.72611400  |
| H  | -4.28095100 | -3.83986500 | -1.82720200 |
| H  | -5.57226500 | -2.23727500 | -0.47090400 |
| C  | 0.78113900  | -2.31623200 | -0.27260500 |
| H  | 1.52629100  | -1.58105100 | 0.06316600  |
| Cl | -0.97705300 | 3.21929300  | 1.63643500  |
| H  | 0.91788100  | 1.04238100  | 2.46232600  |
| Li | 1.89820300  | 0.38599000  | -0.86096700 |
| O  | 2.14851800  | 1.48861200  | -2.39361500 |
| C  | 0.85093200  | 1.64326300  | -3.02251900 |
| C  | 2.56948200  | 2.76061000  | -1.86688500 |
| C  | 0.41529700  | 3.08857800  | -2.76131100 |
| H  | 0.95392700  | 1.40453200  | -4.08472000 |
| H  | 0.17055800  | 0.92219100  | -2.55510900 |
| C  | 1.27022400  | 3.48535200  | -1.55408800 |
| H  | 3.19902800  | 2.55831200  | -0.99557100 |
| H  | 3.16181200  | 3.28451900  | -2.62829300 |
| H  | -0.65582600 | 3.16106300  | -2.56493200 |
| H  | 0.65622500  | 3.72122800  | -3.62235400 |
| H  | 0.84094500  | 3.07715800  | -0.63300600 |
| H  | 1.39762600  | 4.56546600  | -1.45179000 |
| O  | 3.59252700  | 0.13117200  | -0.05212100 |
| C  | 3.61292000  | -0.10263700 | 1.36008600  |
| C  | 4.91752600  | -0.08693800 | -0.53586800 |
| C  | 4.49438900  | -1.33917300 | 1.51065800  |
| H  | 4.05154600  | 0.77274400  | 1.85906600  |
| H  | 2.57612900  | -0.22366400 | 1.67956300  |
| C  | 5.51871500  | -1.18978700 | 0.36257500  |
| H  | 4.84087100  | -0.35968200 | -1.59101400 |
| H  | 5.48348700  | 0.84970500  | -0.45271100 |
| H  | 3.88858800  | -2.23879500 | 1.37151600  |
| H  | 4.96529700  | -1.39408000 | 2.49412600  |
| H  | 5.64195500  | -2.12838000 | -0.18260200 |
| H  | 6.50092100  | -0.88860500 | 0.73380600  |
| C  | 0.53684600  | -3.26883900 | 0.90367300  |
| H  | 0.27678400  | -2.69282400 | 1.79717600  |
| H  | -0.29560200 | -3.94609100 | 0.68721100  |
| H  | 1.42086800  | -3.87514200 | 1.12943900  |
| C  | 1.42181300  | -3.02493900 | -1.51387700 |
| C  | 0.89600100  | -4.44891100 | -1.74129900 |
| H  | -0.19035100 | -4.49263900 | -1.81439400 |
| H  | 1.31181800  | -4.85328200 | -2.67088400 |
| H  | 1.19624800  | -5.11594200 | -0.92709600 |
| C  | 2.93437900  | -3.14138600 | -1.27203600 |
| H  | 3.42098600  | -3.64934200 | -2.11236800 |
| H  | 3.38685000  | -2.15011700 | -1.16240400 |
| H  | 3.15323200  | -3.71714300 | -0.36509200 |
| C  | 1.19795100  | -2.18088000 | -2.77078900 |
| H  | 1.61376800  | -1.17002300 | -2.65431400 |
| H  | 1.69951600  | -2.63920100 | -3.63087200 |
| H  | 0.13328600  | -2.07115300 | -2.99576600 |

### [D]

Electronic energy from IRC: -2333.52181147 a.u.

Cartesian coordinates

| ATOM | X           | Y           | Z          |
|------|-------------|-------------|------------|
| P    | -0.98350200 | 0.02613900  | 0.17062300 |
| C    | -0.99975200 | -0.13059600 | 2.00462900 |
| C    | -1.98785800 | -0.81002600 | 2.72418200 |
| C    | 0.10358200  | 0.37778600  | 2.69832900 |



|    |             |             |             |
|----|-------------|-------------|-------------|
| C  | -1.86481000 | -0.98160900 | 4.10250000  |
| H  | -2.85358400 | -1.21640600 | 2.21178900  |
| C  | 0.22766800  | 0.20579000  | 4.07349300  |
| C  | -0.75849400 | -0.47908900 | 4.78059900  |
| H  | -2.64096100 | -1.51210200 | 4.64600000  |
| H  | 1.08844000  | 0.61519500  | 4.59512000  |
| H  | -0.66792100 | -0.61408700 | 5.85442600  |
| C  | -1.91879600 | 1.62339800  | -0.34976000 |
| C  | -2.62385200 | 1.53458300  | -1.56250800 |
| C  | -1.82941300 | 2.91124000  | 0.18945700  |
| C  | -3.21955700 | 2.63132800  | -2.18096200 |
| H  | -2.71103300 | 0.56165800  | -2.03826500 |
| C  | -2.42887900 | 4.02483000  | -0.39669500 |
| C  | -3.13143300 | 3.88612900  | -1.58873700 |
| H  | -3.75204400 | 2.50081000  | -3.11827600 |
| H  | -2.33686500 | 4.99170400  | 0.08686600  |
| H  | -3.59747900 | 4.75349700  | -2.04599000 |
| O  | 0.38761300  | 0.67021000  | -0.21585900 |
| N  | -0.37363100 | -1.74987900 | -0.23113800 |
| C  | -1.64725800 | -2.26404000 | -0.28774000 |
| C  | -2.43405000 | -1.09835800 | -0.25048800 |
| C  | -2.26569500 | -3.51791300 | -0.33144200 |
| C  | -3.81013900 | -1.12854900 | -0.27563900 |
| C  | -3.66708100 | -3.54177100 | -0.36755500 |
| H  | -1.70590800 | -4.44596400 | -0.34940400 |
| C  | -4.44035100 | -2.38495300 | -0.34189400 |
| H  | -4.39582000 | -0.21288100 | -0.23373700 |
| H  | -4.16520800 | -4.50682600 | -0.41570200 |
| H  | -5.52279200 | -2.45319200 | -0.37174400 |
| C  | 0.89150300  | -2.42023100 | -0.06475500 |
| H  | 1.59048400  | -1.62385100 | 0.23728000  |
| Cl | -0.93284200 | 3.22678900  | 1.66456600  |
| H  | 0.84593700  | 0.93973400  | 2.14001200  |
| Li | 1.91478400  | 0.35952600  | -0.99502900 |
| O  | 2.22028700  | 1.62206500  | -2.39781900 |
| C  | 0.96150700  | 1.83374500  | -3.08607600 |
| C  | 2.62497900  | 2.85173100  | -1.77189700 |
| C  | 0.52167000  | 3.26478200  | -2.75912600 |
| H  | 1.12266700  | 1.66142200  | -4.15369500 |
| H  | 0.24798700  | 1.10400900  | -2.69374900 |
| C  | 1.32239000  | 3.58563400  | -1.49336200 |
| H  | 3.19661300  | 2.58838400  | -0.87638800 |
| H  | 3.27347400  | 3.40825600  | -2.46126700 |
| H  | -0.55728400 | 3.32880700  | -2.59935100 |
| H  | 0.79739900  | 3.94731800  | -3.57004800 |
| H  | 0.83466600  | 3.14287700  | -0.61999300 |
| H  | 1.46400400  | 4.65688700  | -1.33260900 |
| O  | 3.53064400  | 0.03416400  | -0.03716000 |
| C  | 3.58320000  | -0.13939600 | 1.38212500  |
| C  | 4.84217000  | -0.19994200 | -0.55900900 |
| C  | 4.50421800  | -1.33856400 | 1.56690600  |
| H  | 3.99654800  | 0.76885300  | 1.84213200  |
| H  | 2.56125400  | -0.29333100 | 1.73307200  |
| C  | 5.53677000  | -1.15588400 | 0.43581700  |
| H  | 4.72259900  | -0.61838800 | -1.56147000 |
| H  | 5.37085900  | 0.75710500  | -0.63808400 |
| H  | 3.93230000  | -2.26080800 | 1.42841000  |
| H  | 4.96177000  | -1.36498100 | 2.55783400  |
| H  | 5.79648100  | -2.10806000 | -0.03195400 |
| H  | 6.45927700  | -0.70824300 | 0.81323700  |
| C  | 0.86448700  | -3.43131600 | 1.08870900  |
| H  | 0.48427800  | -2.92850500 | 1.98391400  |
| H  | 0.20291700  | -4.27683700 | 0.87794800  |
| H  | 1.86008900  | -3.82899100 | 1.31157400  |
| C  | 1.46312400  | -2.98046400 | -1.40995900 |
| C  | 0.57233000  | -4.08206100 | -1.99105400 |
| H  | -0.41827400 | -3.69550600 | -2.24792600 |
| H  | 1.02602900  | -4.48882500 | -2.90244500 |
| H  | 0.44796900  | -4.91239100 | -1.28776700 |

|   |            |             |             |
|---|------------|-------------|-------------|
| C | 2.87805800 | -3.53066600 | -1.19796100 |
| H | 3.33380200 | -3.78817400 | -2.16140700 |
| H | 3.51429700 | -2.77565400 | -0.71742600 |
| H | 2.88443400 | -4.43216000 | -0.57729800 |
| C | 1.55135500 | -1.83795000 | -2.43177500 |
| H | 2.41779200 | -1.18975800 | -2.22734400 |
| H | 1.71035400 | -2.22798500 | -3.44377600 |
| H | 0.63094300 | -1.24416400 | -2.43137900 |

## E

M06-2X SCF energy  
in gas phase: -2333.52812597 a.u.  
M06-2X enthalpy  
in gas phase : -2332.78706300 a.u.  
M06-2X free energy  
in gas phase: -2332.92449400 a.u.  
M06-2X SCF energy  
in solution: -2334.03762846 a.u.  
M06-2X enthalpy  
in solution: -2333.29656549 a.u.  
M06-2X free energy  
in solution: -2333.43399649 a.u.

## Cartesian coordinates

| ATOM | X           | Y           | Z           |
|------|-------------|-------------|-------------|
| P    | 1.06917700  | 0.46786500  | -0.17288300 |
| C    | 0.71712200  | 0.78474600  | 1.58959800  |
| C    | 1.31018300  | 1.83415400  | 2.29377300  |
| C    | -0.25134800 | 0.00058600  | 2.22104800  |
| C    | 0.92550400  | 2.10125800  | 3.60631700  |
| H    | 2.06484800  | 2.44941400  | 1.81175000  |
| C    | -0.64052300 | 0.27175600  | 3.52855000  |
| C    | -0.05347400 | 1.32743100  | 4.22427200  |
| H    | 1.39247600  | 2.91898500  | 4.14705700  |
| H    | -1.39290800 | -0.34648800 | 4.01167400  |
| H    | -0.35248500 | 1.54022800  | 5.24616300  |
| C    | 2.73248500  | -0.47765400 | -0.20124400 |
| C    | 3.39755200  | -0.40547300 | -1.43986200 |
| C    | 3.27735800  | -1.38320300 | 0.71242500  |
| C    | 4.52572400  | -1.15855400 | -1.74349600 |
| H    | 3.00112200  | 0.26672200  | -2.19729100 |
| C    | 4.41109800  | -2.14948800 | 0.43698200  |
| C    | 5.04033300  | -2.03777600 | -0.79516100 |
| H    | 4.99717400  | -1.06129900 | -2.71675600 |
| H    | 4.78612400  | -2.82937800 | 1.19463300  |
| H    | 5.92147300  | -2.63479900 | -1.00865600 |
| O    | 0.29172000  | -0.75145900 | -0.73360400 |
| N    | -0.43388700 | 1.73266200  | -0.64945000 |
| C    | 0.46947400  | 2.72436800  | -0.86883500 |
| C    | 1.71832500  | 2.06164000  | -0.81213900 |
| C    | 0.44690300  | 4.11291200  | -1.09122300 |
| C    | 2.92463700  | 2.71349800  | -0.98322700 |
| C    | 1.66995400  | 4.75967700  | -1.27610100 |
| H    | -0.47990200 | 4.67380000  | -1.13759300 |
| C    | 2.89630800  | 4.09302200  | -1.22820100 |
| H    | 3.86955200  | 2.18094100  | -0.91170400 |
| H    | 1.66417600  | 5.83128200  | -1.46086700 |
| H    | 3.82044700  | 4.64270300  | -1.37070400 |
| C    | -1.80027900 | 1.83659900  | -0.20768700 |
| H    | -1.99970100 | 0.87593900  | 0.30301700  |
| Cl   | 2.56371500  | -1.65916400 | 2.29702400  |
| H    | -0.67507200 | -0.84982600 | 1.68893500  |
| Li   | -1.35758300 | -1.37374300 | -0.76502800 |
| O    | -1.10397100 | -3.11239000 | -1.59094500 |
| C    | 0.00242400  | -3.06412600 | -2.51801100 |
| C    | -0.77012800 | -4.08917100 | -0.59616100 |
| C    | 1.24974000  | -3.53845100 | -1.74665300 |

|   |             |             |             |    |             |             |             |
|---|-------------|-------------|-------------|----|-------------|-------------|-------------|
| H | -0.23504600 | -3.72024500 | -3.36293400 | H  | -1.34313100 | -0.11997000 | 4.07431500  |
| H | 0.08590700  | -2.03195100 | -2.86015200 | H  | -0.31445100 | 1.86055800  | 5.16274100  |
| C | 0.71714700  | -3.87526300 | -0.34281700 | C  | 2.82095900  | -0.48426200 | -0.12792000 |
| H | -1.40974100 | -3.90438800 | 0.27107900  | C  | 3.49735300  | -0.46441500 | -1.36175200 |
| H | -0.97891400 | -5.09218300 | -0.99414700 | C  | 3.38743600  | -1.30368500 | 0.85180300  |
| H | 2.00964700  | -2.75627000 | -1.69831000 | C  | 4.67102900  | -1.17171900 | -1.59402800 |
| H | 1.68276500  | -4.42034400 | -2.22716500 | H  | 3.07613500  | 0.12793900  | -2.17024400 |
| H | 0.85898000  | -3.01784500 | 0.31987600  | C  | 4.57067100  | -2.01492000 | 0.64908500  |
| H | 1.19699700  | -4.75158600 | 0.09915300  | C  | 5.21910600  | -1.94635400 | -0.57606700 |
| O | -2.89792200 | -1.79540700 | 0.34901300  | H  | 5.15278900  | -1.11840100 | -2.56548900 |
| C | -3.45426600 | -1.25601900 | 1.56112400  | H  | 4.96523400  | -2.62385600 | 1.45548500  |
| C | -3.89933400 | -2.60505000 | -0.28017200 | H  | 6.13861000  | -2.50164200 | -0.73260300 |
| C | -4.98733600 | -1.34358100 | 1.41284700  | O  | 0.36974100  | -0.86767900 | -0.62910000 |
| H | -3.08914800 | -1.84817300 | 2.40793400  | N  | -0.50851300 | 1.62453300  | -0.68727100 |
| H | -3.08515600 | -0.23312400 | 1.66623800  | C  | 0.39149600  | 2.58567500  | -0.99527600 |
| C | -5.19031200 | -1.84187000 | -0.02718300 | C  | 1.65810500  | 1.95031900  | -0.92966900 |
| H | -3.62131200 | -2.71769900 | -1.32999300 | C  | 0.35150300  | 3.96302000  | -1.30444300 |
| H | -3.91641900 | -3.59689100 | 0.19340300  | C  | 2.84889200  | -2.61479800 | -1.17391700 |
| H | -5.46951500 | -0.37982900 | 1.58959100  | C  | 1.55391800  | 4.61509200  | -1.56393200 |
| H | -5.39937500 | -2.06020900 | 2.12817100  | H  | -0.58403400 | 4.50783400  | -1.35901900 |
| H | -5.26166200 | -1.00033200 | -0.72355300 | C  | 2.79429100  | 3.97162200  | -1.50733300 |
| H | -6.07980700 | -2.46480300 | -0.14124400 | H  | 3.80598700  | 2.10813800  | -1.08476700 |
| C | -2.02872400 | 2.92932600  | 0.84546500  | H  | 1.52408800  | 5.67295300  | -1.81464100 |
| H | -1.25683300 | 2.85069700  | 1.61739200  | H  | 3.70593900  | 4.52434500  | -1.70633700 |
| H | -1.97237900 | 3.93437700  | 0.41601000  | C  | -1.85560500 | 1.79773800  | -0.20972200 |
| H | -3.00548700 | 2.82353500  | 1.32816000  | H  | -2.06559400 | 0.87660600  | 0.36856600  |
| C | -2.81163700 | 1.86748200  | -1.39558600 | Cl | 2.63185200  | -1.54219700 | 2.41974000  |
| C | -2.55761000 | 3.06748500  | -2.31055000 | H  | -0.61844000 | -0.79357500 | 1.79410300  |
| H | -1.54893000 | 3.02678600  | -2.73298300 | Li | -1.35259200 | -1.30027000 | -0.67928500 |
| H | -3.27795500 | 3.07585400  | -3.13698800 | O  | -1.20442600 | -2.98234800 | -1.65492900 |
| H | -2.66763400 | 4.01387600  | -1.76939800 | C  | -0.18417200 | -2.88707900 | -2.66887400 |
| C | -4.24850900 | 1.91648900  | -0.86479000 | C  | -0.82913500 | -4.05689300 | -0.78462500 |
| H | -4.96607700 | 1.73417400  | -1.67390500 | C  | 1.11047000  | -3.45336400 | -2.05433300 |
| H | -4.40474400 | 1.14639900  | -0.09542100 | H  | -0.51441900 | -3.46665300 | -3.53865300 |
| H | -4.48747600 | 2.88771900  | -0.42060600 | H  | -0.09949200 | -1.83338000 | -2.93822200 |
| C | -2.63188700 | 0.57909600  | -2.21068000 | C  | 0.68598000  | -3.94137000 | -0.65647000 |
| H | -3.03214500 | -0.27930300 | -1.64938700 | H  | -1.37170900 | -3.92183400 | 0.15478400  |
| H | -3.18695000 | 0.62328400  | -3.15460200 | H  | -1.12992400 | -5.00953100 | -1.24323800 |
| H | -1.56981800 | 0.41963200  | -2.43224400 | H  | 1.87991200  | -2.68357300 | -1.97439400 |
|   |             |             |             | H  | 1.49462400  | -4.27534900 | -2.66468100 |
|   |             |             |             | H  | 0.93914500  | -3.18315600 | 0.08804200  |
|   |             |             |             | H  | 1.14870500  | -4.89085900 | -0.37754500 |
|   |             |             |             | O  | -2.84163200 | -1.80924200 | 0.50004600  |
|   |             |             |             | C  | -3.36154100 | -1.26939400 | 1.72883900  |
|   |             |             |             | C  | -3.85321100 | -2.64010900 | -0.08479900 |
|   |             |             |             | C  | -4.89626700 | -1.40192400 | 1.64986400  |
|   |             |             |             | H  | -2.94208700 | -1.83735000 | 2.56691100  |
|   |             |             |             | H  | -3.02080900 | -0.23407900 | 1.80391700  |
|   |             |             |             | C  | -5.14774200 | -1.90250500 | 0.21908400  |
|   |             |             |             | H  | -3.61550600 | -2.75136300 | -1.14440300 |
|   |             |             |             | H  | -3.83291000 | -3.62962100 | 0.39370100  |
|   |             |             |             | H  | -5.39825500 | -0.45365800 | 1.85320700  |
|   |             |             |             | H  | -5.25404000 | -2.13350200 | 2.37926100  |
|   |             |             |             | H  | -5.26368500 | -1.06240800 | -0.47311100 |
|   |             |             |             | H  | -6.02860600 | -2.54297400 | 0.14000300  |
|   |             |             |             | C  | -2.02837000 | 2.95335200  | 0.78642900  |
|   |             |             |             | H  | -1.22849900 | 2.90438000  | 1.53189800  |
|   |             |             |             | H  | -1.97434300 | 3.93239300  | 0.30102800  |
|   |             |             |             | H  | -2.98694700 | 2.88960000  | 1.31126900  |
|   |             |             |             | C  | -2.91418500 | 1.77960200  | -1.35832800 |
|   |             |             |             | C  | -2.69928200 | 2.93400900  | -2.33952300 |
|   |             |             |             | H  | -1.70948800 | 2.87164600  | -2.80216900 |
|   |             |             |             | H  | -3.45399400 | 2.90292000  | -3.13425300 |
|   |             |             |             | H  | -2.78765300 | 3.90560300  | -1.84104700 |
|   |             |             |             | C  | -4.32786800 | 1.85726900  | -0.77109200 |
|   |             |             |             | H  | -5.07965900 | 1.63792800  | -1.53892200 |
|   |             |             |             | H  | -4.45189300 | 1.12694300  | 0.04166600  |
|   |             |             |             | H  | -4.54671000 | 2.84984000  | -0.36548200 |
|   |             |             |             | C  | -2.77267700 | 0.45673700  | -2.12370100 |

## TS2

### Ring-opening

|                      |                           |
|----------------------|---------------------------|
| M06-2X SCF energy    |                           |
| in gas phase:        | -2333.52786064 a.u.       |
| M06-2X enthalpy      |                           |
| in gas phase :       | -2332.78774600 a.u.       |
| M06-2X free energy   |                           |
| in gas phase:        | -2332.92323900 a.u.       |
| M06-2X SCF energy    |                           |
| in solution:         | -2334.03741823 a.u.       |
| M06-2X enthalpy      |                           |
| in solution:         | -2333.29730359 a.u.       |
| M06-2X free energy   |                           |
| in solution:         | -2333.43279659 a.u.       |
| Imaginary frequency: | -37.3311 cm <sup>-1</sup> |

### Cartesian coordinates

| ATOM | X           | Y          | Z           |
|------|-------------|------------|-------------|
| P    | 1.13539400  | 0.38689600 | -0.14921800 |
| C    | 0.76250500  | 0.83741500 | 1.57671000  |
| C    | 1.35004400  | 1.94027200 | 2.19817500  |
| C    | -0.20135100 | 0.09585800 | 2.26351200  |
| C    | 0.96260000  | 2.30350100 | 3.48672700  |
| H    | 2.09932400  | 2.52284000 | 1.66914700  |
| C    | -0.59323300 | 0.46354800 | 3.54615700  |
| C    | -0.01259100 | 1.57258400 | 4.16031400  |
| H    | 1.42338900  | 3.16303600 | 3.96420100  |

|   |             |             |             |
|---|-------------|-------------|-------------|
| H | -3.12902100 | -0.38031600 | -1.50508800 |
| H | -3.38283000 | 0.45433800  | -3.03397800 |
| H | -1.72501000 | 0.29784400  | -2.40803000 |

## F

M06-2X SCF energy  
in gas phase: -2333.57316942 a.u.  
M06-2X enthalpy  
in gas phase : -2332.83052800 a.u.  
M06-2X free energy  
in gas phase: -2332.96577400 a.u.  
M06-2X SCF energy  
in solution: -2334.07796823 a.u.  
M06-2X enthalpy  
in solution: -2333.33532681 a.u.  
M06-2X free energy  
in solution: -2333.47057281 a.u.

## Cartesian coordinates

| ATOM | X           | Y           | Z           |
|------|-------------|-------------|-------------|
| P    | -1.39953200 | 0.18121500  | 0.00872700  |
| C    | -1.15952900 | -0.89880700 | 1.45599100  |
| C    | -0.81306200 | -2.24631500 | 1.34154800  |
| C    | -1.28832700 | -0.31717700 | 2.71876000  |
| C    | -0.57537200 | -3.00011500 | 2.48649300  |
| H    | -0.73019300 | -2.69421900 | 0.35393300  |
| C    | -1.07256400 | -1.07981800 | 3.86472700  |
| C    | -0.70553400 | -2.41792800 | 3.74788200  |
| H    | -0.29318200 | -4.04475100 | 2.39584900  |
| H    | -1.18067700 | -0.62709900 | 4.84591400  |
| H    | -0.52672900 | -3.01159400 | 4.63945200  |
| C    | -3.19085500 | 0.58379800  | -0.00593800 |
| C    | -3.49719100 | 1.94860800  | -0.05464900 |
| C    | -4.25653900 | -0.32041900 | 0.06800400  |
| C    | -4.81287100 | 2.39871000  | -0.04491900 |
| H    | -2.66972500 | 2.65096200  | -0.08835400 |
| C    | -5.57778300 | 0.11693800  | 0.08209900  |
| C    | -5.85397400 | 1.47880100  | 0.02297600  |
| H    | -5.02259500 | 3.46249100  | -0.08662300 |
| H    | -6.37705700 | -0.61375900 | 0.13945700  |
| H    | -6.88598800 | 1.81506200  | 0.03338000  |
| O    | -0.66253600 | 1.49320000  | 0.25657900  |
| N    | 1.30514400  | -0.67205300 | -0.76453300 |
| C    | 0.37151700  | -1.18888300 | -1.57762900 |
| C    | -0.99227800 | -0.71261100 | -1.46264400 |
| C    | 0.53720600  | -2.20892600 | -2.57484500 |
| C    | -1.98688800 | -1.05450000 | -2.39202200 |
| C    | -0.46719200 | -2.54676000 | -3.45627600 |
| H    | 1.49611800  | -2.69279300 | -2.68005700 |
| C    | -1.73626100 | -1.94837100 | -3.41440900 |
| H    | -2.98009900 | -0.62471300 | -2.28878600 |
| H    | -0.25758000 | -3.29951400 | -4.21297700 |
| H    | -2.50544100 | -2.20976000 | -4.13177200 |
| C    | 2.61592800  | -1.30045800 | -0.57890300 |
| H    | 2.96515500  | -0.87595900 | 0.37496800  |
| Cl   | -3.98640900 | -2.04182200 | 0.14086800  |
| H    | -1.54175600 | 0.73714200  | 2.80017000  |
| Li   | 1.18723100  | 1.12907000  | 0.11252200  |
| O    | 1.68757800  | 2.87091100  | -0.64590500 |
| C    | 1.00271800  | 2.91216900  | -1.90663100 |
| C    | 1.38702700  | 4.07503900  | 0.05242600  |
| C    | -0.21742300 | 3.83506400  | -1.72233700 |
| H    | 1.69303000  | 3.29627900  | -2.66763700 |
| H    | 0.72860400  | 1.88288100  | -2.15971700 |
| C    | -0.06554000 | 4.39576300  | -0.29421700 |
| H    | 1.55414300  | 3.88715800  | 1.11621300  |
| H    | 2.06866500  | 4.86871900  | -0.28613400 |

|   |             |             |             |
|---|-------------|-------------|-------------|
| H | -1.14728400 | 3.27279600  | -1.82690200 |
| H | -0.21221400 | 4.63206500  | -2.47047300 |
| H | -0.72399000 | 3.85930800  | 0.38994800  |
| H | -0.27291100 | 5.46696700  | -0.23439100 |
| O | 2.19148800  | 1.09242800  | 1.77113500  |
| C | 2.11433300  | -0.03680900 | 2.64662200  |
| C | 3.34312500  | 1.83480200  | 2.14730100  |
| C | 3.57332900  | -0.42041100 | 2.96821500  |
| H | 1.56793600  | 0.25498900  | 3.55156100  |
| H | 1.54708800  | -0.81295700 | 3.12504500  |
| C | 4.40328400  | 0.77332800  | 2.44416000  |
| H | 3.59296600  | 2.50072100  | 1.31745400  |
| H | 3.11638700  | 2.43520100  | 3.04072100  |
| H | 3.86014000  | -1.34853600 | 2.46694900  |
| H | 3.70730400  | -0.56754700 | 4.04255300  |
| H | 4.92265500  | 0.50390400  | 1.52034800  |
| H | 5.14814900  | 1.12319100  | 3.16231200  |
| C | 2.59152500  | -2.82345800 | -0.33272600 |
| H | 1.65468500  | -3.09796700 | 0.16193700  |
| H | 2.68304800  | -3.42728300 | -1.23964800 |
| H | 3.41508200  | -3.11284800 | 0.32826400  |
| C | 3.75486700  | -0.85009600 | -1.55546800 |
| C | 3.56698900  | -1.28023800 | -3.01298600 |
| H | 2.64132600  | -0.87434200 | -3.43110500 |
| H | 4.40495000  | -0.90730500 | -3.61481000 |
| H | 3.55085400  | -2.37038000 | -3.12344100 |
| C | 5.08513900  | -1.42559500 | -1.04783900 |
| H | 5.92576800  | -0.99368700 | -1.60262900 |
| H | 5.23556700  | -1.20320500 | 0.01705400  |
| H | 5.12968900  | -2.51262500 | -1.17136500 |
| C | 3.83629400  | 0.67843500  | -1.52964900 |
| H | 3.90242100  | 1.05893700  | -0.50248200 |
| H | 4.71582300  | 1.03136300  | -2.08140500 |
| H | 2.94726800  | 1.11772800  | -1.98745700 |

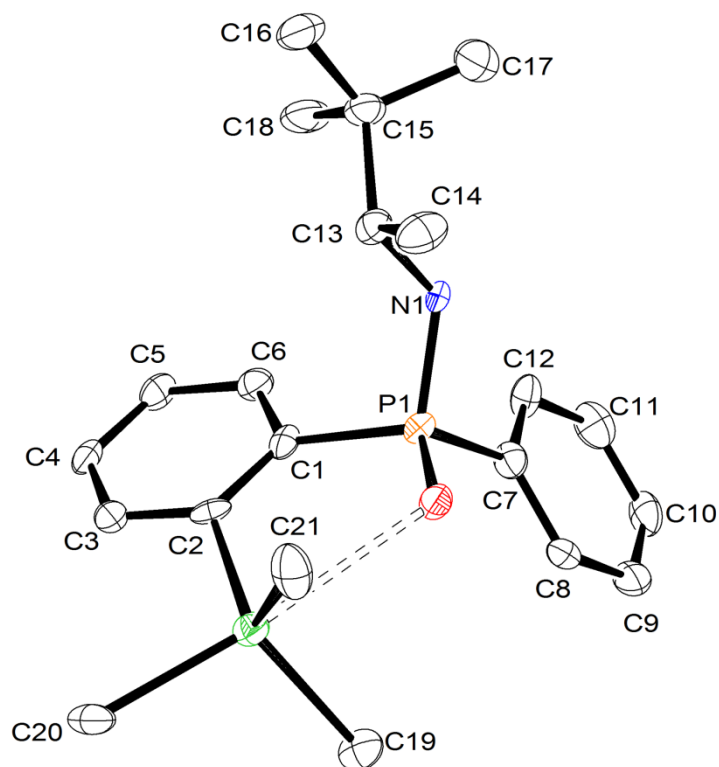

**Figure S20.** X-ray crystal structure of (*S<sub>p</sub>*)-**19** (thermal ellipsoids shown at 50% probability) including atomic numbering. Hydrogen atoms have been omitted for clarity.

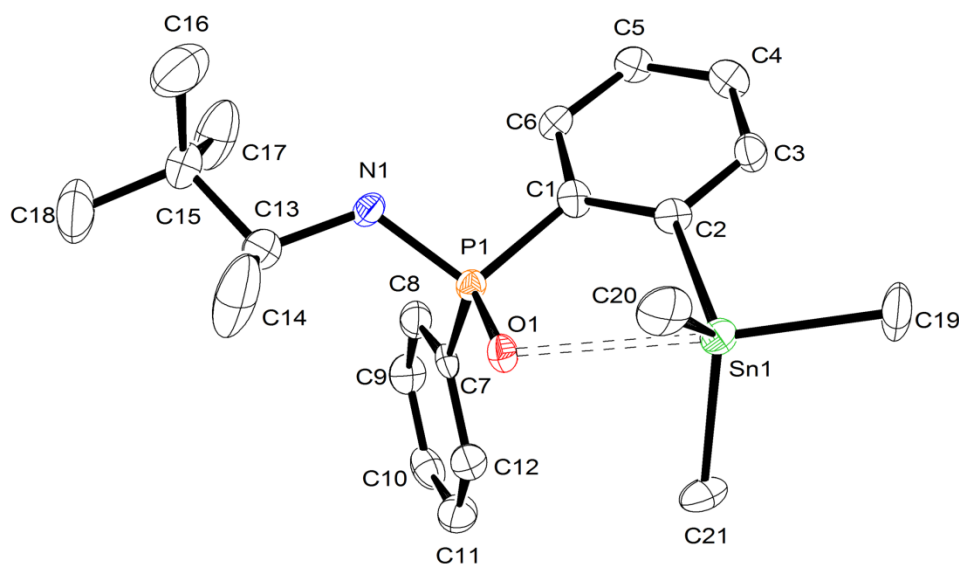

**Figure S21.** X-ray crystal structure of (*R<sub>p</sub>*)-**19'** (thermal ellipsoids shown at 50% probability) including atomic numbering. Hydrogen atoms have been omitted for clarity.

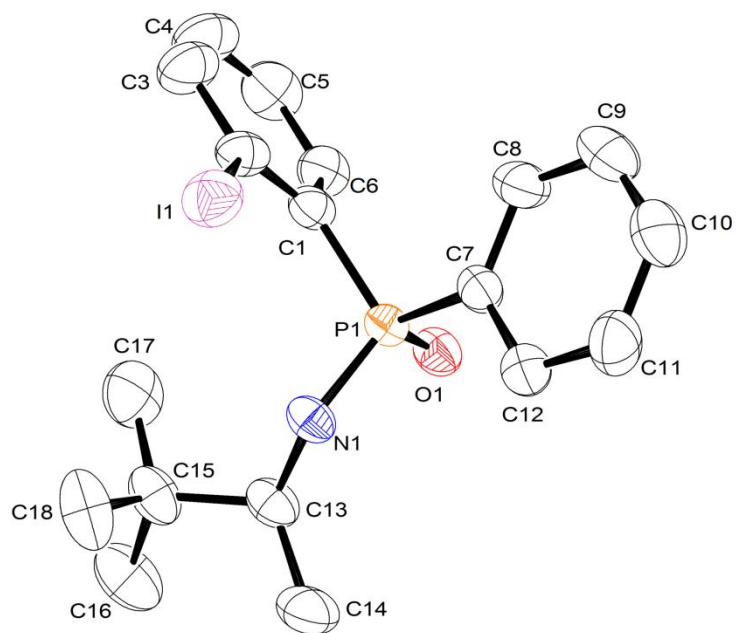

**Figure S22.** X-ray crystal structure of **20** (thermal ellipsoids shown at 40% probability) including atomic numbering. Hydrogen atoms have been omitted for clarity.

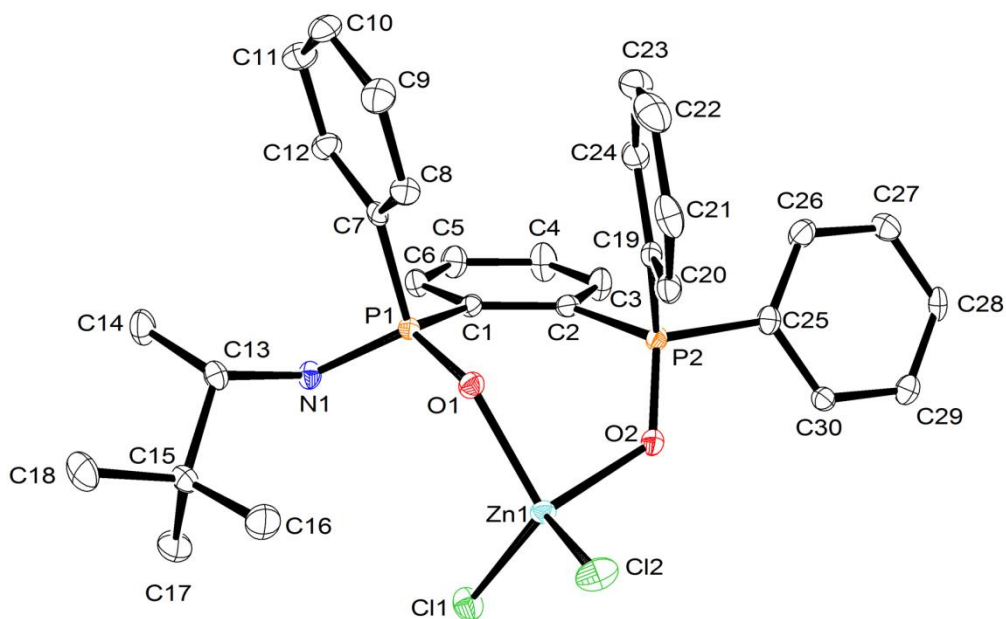

**Figure S23.** X-ray crystal structure of **34** (thermal ellipsoids shown at 50% probability) including atomic numbering. Protons have been omitted for clarity.

**Table S2** Selected crystal data for ligands **19**, **19'**, **20** and complex **34**.

|                                                                    | <b>19</b>                                             | <b>19'</b>                                          | <b>20</b>                                             | <b>34</b>                                                                         |
|--------------------------------------------------------------------|-------------------------------------------------------|-----------------------------------------------------|-------------------------------------------------------|-----------------------------------------------------------------------------------|
| Empirical formula                                                  | C <sub>21</sub> H <sub>32</sub> INO <sub>3</sub> Sn   | C <sub>21</sub> H <sub>32</sub> INO <sub>3</sub> Sn | C <sub>18</sub> H <sub>23</sub> INO <sub>3</sub> P    | C <sub>30</sub> H <sub>33</sub> Cl <sub>2</sub> NO <sub>2</sub> P <sub>2</sub> Zn |
| <i>M</i>                                                           | 464.16                                                | 464.16                                              | 427.24                                                | 637.80                                                                            |
| Crystal system                                                     | Orthorhombic                                          | Tetragonal                                          | Orthorhombic                                          | Orthorhombic                                                                      |
| Space group                                                        | <i>P</i> 2 <sub>1</sub> 2 <sub>1</sub> 2 <sub>1</sub> | <i>P</i> 4 <sub>3</sub> 2 <sub>1</sub> 2            | <i>P</i> 2 <sub>1</sub> 2 <sub>1</sub> 2 <sub>1</sub> | <i>P</i> 2 <sub>1</sub> 2 <sub>1</sub> 2 <sub>1</sub>                             |
| Temperature/K                                                      | 100                                                   | 100                                                 | 293                                                   | 100                                                                               |
| <i>a</i> /Å                                                        | 9.9935(14)                                            | 9.3648(2)                                           | 10.1337(7)                                            | 9.8384(2)                                                                         |
| <i>b</i> /Å                                                        | 14.054(2)                                             | 9.3648(2)                                           | 10.2928(7)                                            | 17.1397(4)                                                                        |
| <i>c</i> /Å                                                        | 15.830(2)                                             | 51.2257(12)                                         | 18.6620(13)                                           | 17.4704(4)                                                                        |
| $\alpha$ (°)                                                       | 90                                                    | 90                                                  | 90                                                    | 90                                                                                |
| $\beta$ (°)                                                        | 90                                                    | 90                                                  | 90                                                    | 90                                                                                |
| $\gamma$ (°)                                                       | 90                                                    | 90                                                  | 90                                                    | 90                                                                                |
| <i>V</i> /Å <sup>3</sup>                                           | 2223.2(5)                                             | 4492.5(2)                                           | 1946.5(2)                                             | 2945.99(11)                                                                       |
| <i>Z</i>                                                           | 4                                                     | 8                                                   | 4                                                     | 4                                                                                 |
| $\mu$ /mm <sup>-1</sup>                                            | 1.23                                                  | 9.77                                                | 1.73                                                  | 4.08                                                                              |
| <i>D</i> <sub>calcd</sub> /g cm <sup>-3</sup>                      | 1.387                                                 | 1.372                                               | 1.458                                                 | 1.438                                                                             |
| Crystal dimensions/mm                                              | 0.40 x 0.22 x 0.14                                    | 0.22 x 0.10 x 0.05                                  | 0.60 x 0.45 x 0.33                                    | 1.13 x 0.95 x 0.26                                                                |
| <i>F</i> (000)                                                     | 952                                                   | 1904                                                | 856                                                   | 1320                                                                              |
| $\theta$ range for data collection/°                               | 2.5-25.1                                              | 3.5-59.0                                            | 2.8-24.5                                              | 3.6-72.2                                                                          |
| Refls. measured                                                    | 9380                                                  | 13912                                               | 9653                                                  | 17913                                                                             |
| Refls. unique                                                      | 3936                                                  | 3243                                                | 3176                                                  | 5811                                                                              |
| Parameters/restraints                                              | 230/0                                                 | 226/0                                               | 203/0                                                 | 348/0                                                                             |
| <i>GOF</i> on <i>F</i> <sup>2</sup>                                | 1.06                                                  | 1.05                                                | 1.10                                                  | 1.07                                                                              |
| <i>R</i> 1 [ <i>I</i> ≥ 2σ( <i>I</i> )]                            | 0.045                                                 | 0.053                                               | 0.032                                                 | 0.029                                                                             |
| <i>wR</i> 2 (all data)                                             | 0.094                                                 | 0.138                                               | 0.082                                                 | 0.069                                                                             |
| $\Delta\rho_{\max}/\Delta\rho_{\min}/\text{e}\cdot\text{\AA}^{-3}$ | 0.83/-1.14                                            | 3.12/-0.95                                          | 0.73/-0.38                                            | 0.32/-0.29                                                                        |

**Table S3** Selected bond lengths (Å) and angles (°) for ligands **19**, **19'**, **20** and complex **34**.

|              | <b>19</b> | <b>19'</b> | <b>20</b>   | <b>34</b> |              |           |
|--------------|-----------|------------|-------------|-----------|--------------|-----------|
| P1-O1        | 1.492(4)  | 1.496(4)   | P1-O1       | 1.467(3)  | P1-O1        | 1.502(2)  |
| P1-N1        | 1.648(5)  | 1.652(5)   | P1-N1       | 1.629(4)  | P1-N1        | 1.621(2)  |
| P1-C1        | 1.813(6)  | 1.813(6)   | P1-C1       | 1.831(4)  | P1-C1        | 1.817(3)  |
| P1-C7        | 1.813(6)  | 1.806(6)   | P1-C7       | 1.801(4)  | P1-C7        | 1.798(3)  |
| Sn1-C2       | 2.175(6)  | 2.170(6)   | I1-C2       | 2.098(4)  | P2-O2        | 1.506(2)  |
| Sn1-C19      | 2.149(5)  | 2.196(8)   | O1-P1-N1    | 113.2(2)  | P2-C19       | 1.793(3)  |
| Sn1-C20      | 2.167(6)  | 2.118(7)   | O1-P1-C1    | 107.4(2)  | P2-C25       | 1.807(3)  |
| Sn1-C21      | 2.143(7)  | 2.134(6)   | O1-P1-C7    | 113.2(2)  | Zn1-O1       | 1.992(2)  |
| O1-P1-N1     | 119.9(3)  | 119.2(2)   | C1-P1-C7    | 105.0(2)  | Zn1-O2       | 2.002(2)  |
| O1-P1-C1     | 108.5(3)  | 109.0(3)   | P1-N1-C13   | 124.2(3)  | Zn1-Cl1      | 2.2129(8) |
| O1-P1-C7     | 110.6(3)  | 110.6(2)   | O1-P1-C1-C2 | 176.5(3)  | Zn1-Cl2      | 2.2129(8) |
| C1-P1-C7     | 110.8(3)  | 108.6(3)   | N1-P1-C1-C2 | 52.3(4)   | O1-P1-N1     | 117.9(1)  |
| P1-N1-C13    | 121.2(4)  | 123.3(4)   |             |           | O1-P1-C1     | 111.6(1)  |
| C2-Sn1-C19   | 109.4(2)  | 115.2(2)   |             |           | O1-P1-C7     | 107.8(1)  |
| C2-Sn1-C20   | 102.7(2)  | 101.6(3)   |             |           | C1-P1-C7     | 108.8(1)  |
| C2-Sn1-C21   | 120.0(3)  | 115.0(2)   |             |           | O2-P2-C2     | 113.6(1)  |
| C19-Sn1-C20  | 104.8(2)  | 103.0(3)   |             |           | O2-P2-C19    | 113.8(1)  |
| C19-Sn1-C21  | 115.5(3)  | 115.5(3)   |             |           | O2-P2-C25    | 107.2(1)  |
| O1-P1-C1-C2  | 1.3(6)    | 14.7(6)    |             |           | C19-P2-C25   | 105.8(1)  |
| N1-P1-C1-C2  | -128.0(5) | 142.9(5)   |             |           | Zn1-O1-P1    | 134.0(1)  |
| P1-C1-C2-Sn1 | -8.0(7)   | -6.8(7)    |             |           | Zn1-O2-P2    | 127.1(1)  |
|              |           |            |             |           | O2-Zn1-O1    | 90.38(7)  |
|              |           |            |             |           | Cl1-Zn1-Cl2  | 120.75(3) |
|              |           |            |             |           | Cl2-Zn1-O2   | 108.24(6) |
|              |           |            |             |           | O1-P1-C1-C2  | -21.6(3)  |
|              |           |            |             |           | P1-C1-C2-P2  | 5.4(4)    |
|              |           |            |             |           | O2-P2-C2-C1  | 64.8(3)   |
|              |           |            |             |           | C1-P1-O1-Zn1 | -55.8(2)  |
